# Supplementary material for: Plant phenomics: an overview of image acquisition technologies and image data analysis algorithms
Source: PubMed Central journal article supplement (PMC5737281; doi:10.1093/gigascience/gix092), 2017-10-03

# GigaScience

## Plant phenomics: an overview of image acquisition technologies and image data analysis algorithms --Manuscript Draft--

|                                                      |                                                                                                                                                                                                                                                                                                                                                                                                                                                                                                                                                                                                                                                                                                                                                                                                                                                                                                                                                                                                         |                               |
|------------------------------------------------------|---------------------------------------------------------------------------------------------------------------------------------------------------------------------------------------------------------------------------------------------------------------------------------------------------------------------------------------------------------------------------------------------------------------------------------------------------------------------------------------------------------------------------------------------------------------------------------------------------------------------------------------------------------------------------------------------------------------------------------------------------------------------------------------------------------------------------------------------------------------------------------------------------------------------------------------------------------------------------------------------------------|-------------------------------|
| <b>Manuscript Number:</b>                            | GIGA-D-17-00043R1                                                                                                                                                                                                                                                                                                                                                                                                                                                                                                                                                                                                                                                                                                                                                                                                                                                                                                                                                                                       |                               |
| <b>Full Title:</b>                                   | Plant phenomics: an overview of image acquisition technologies and image data analysis algorithms                                                                                                                                                                                                                                                                                                                                                                                                                                                                                                                                                                                                                                                                                                                                                                                                                                                                                                       |                               |
| <b>Article Type:</b>                                 | Review                                                                                                                                                                                                                                                                                                                                                                                                                                                                                                                                                                                                                                                                                                                                                                                                                                                                                                                                                                                                  |                               |
| <b>Funding Information:</b>                          | Ministerio de Economía y Competitividad (ES) (BFU-2013-45148-R)                                                                                                                                                                                                                                                                                                                                                                                                                                                                                                                                                                                                                                                                                                                                                                                                                                                                                                                                         | Prof.Dr. Marcos Egea-Cortines |
|                                                      | Ministerio de Economía y Competitividad (TIN2012-39279)                                                                                                                                                                                                                                                                                                                                                                                                                                                                                                                                                                                                                                                                                                                                                                                                                                                                                                                                                 | Prof Pedro Javier Navarro     |
|                                                      | Fundación Séneca (19398/PI/14)                                                                                                                                                                                                                                                                                                                                                                                                                                                                                                                                                                                                                                                                                                                                                                                                                                                                                                                                                                          | Prof.Dr. Marcos Egea-Cortines |
| <b>Abstract:</b>                                     | The study of phenomes or phenomics has been a central part of biology. The field of automatic phenotype acquisition technologies based on images has seen an important advance in the last years. As other high throughput technologies, it bears from a common set of problems, including data acquisition and analysis. In this review, we give an overview of the main systems developed to acquire images. We give an in-depth analysis of image processing with its major issues, and the algorithms that are being used or emerging as useful to obtain data out of images in an automatic fashion.                                                                                                                                                                                                                                                                                                                                                                                               |                               |
| <b>Corresponding Author:</b>                         | Marcos Egea-Cortines, PhD<br>Universidad Politecnica de Cartagena<br>Cartagena, Murcia SPAIN                                                                                                                                                                                                                                                                                                                                                                                                                                                                                                                                                                                                                                                                                                                                                                                                                                                                                                            |                               |
| <b>Corresponding Author Secondary Information:</b>   |                                                                                                                                                                                                                                                                                                                                                                                                                                                                                                                                                                                                                                                                                                                                                                                                                                                                                                                                                                                                         |                               |
| <b>Corresponding Author's Institution:</b>           | Universidad Politecnica de Cartagena                                                                                                                                                                                                                                                                                                                                                                                                                                                                                                                                                                                                                                                                                                                                                                                                                                                                                                                                                                    |                               |
| <b>Corresponding Author's Secondary Institution:</b> |                                                                                                                                                                                                                                                                                                                                                                                                                                                                                                                                                                                                                                                                                                                                                                                                                                                                                                                                                                                                         |                               |
| <b>First Author:</b>                                 | Fernando Perez-Sanz, MsC                                                                                                                                                                                                                                                                                                                                                                                                                                                                                                                                                                                                                                                                                                                                                                                                                                                                                                                                                                                |                               |
| <b>First Author Secondary Information:</b>           |                                                                                                                                                                                                                                                                                                                                                                                                                                                                                                                                                                                                                                                                                                                                                                                                                                                                                                                                                                                                         |                               |
| <b>Order of Authors:</b>                             | Fernando Perez-Sanz, MsC                                                                                                                                                                                                                                                                                                                                                                                                                                                                                                                                                                                                                                                                                                                                                                                                                                                                                                                                                                                |                               |
|                                                      | Pedro Javier Navarro, PhD                                                                                                                                                                                                                                                                                                                                                                                                                                                                                                                                                                                                                                                                                                                                                                                                                                                                                                                                                                               |                               |
|                                                      | Marcos Egea-Cortines, PhD                                                                                                                                                                                                                                                                                                                                                                                                                                                                                                                                                                                                                                                                                                                                                                                                                                                                                                                                                                               |                               |
| <b>Order of Authors Secondary Information:</b>       |                                                                                                                                                                                                                                                                                                                                                                                                                                                                                                                                                                                                                                                                                                                                                                                                                                                                                                                                                                                                         |                               |
| <b>Response to Reviewers:</b>                        | <p>Dear Dr. Nogoy, thank you very much for the speedy review and the high quality of the referees you chose. We believe that their input has improved our manuscript and we have taken their and your advice into account.</p> <p>Please find enclosed a detailed response that can be also found in the manuscript. We have done a major rewriting to center it around two questions, image acquisition and data analysis. We have deleted a part we wrote about the different types of indexes used as it was informative but not really related to the major points.</p> <p>As a result, we believe that all the referees requests have been met. Some via direct correction and many by rewriting to clarify the points. In those cases where rewriting deleted a request, we have written it down on the letter found below.</p> <p>Please note that the new manuscript has all corrections and rewriting in red.</p> <p>We hope the referees will find this version suitable for publication.</p> |                               |

1. Reviewer reports:

Reviewer #1: # Review giga science 20170317

The manuscript from Perez-Sanz et al is a review of image acquisition technologies and image data analysis algorithms used in plant sciences.

While the manuscript provides a nice overview of the available techniques and algorithms, I feel that it is, at least in this form, not suited for publication. The text needs to be clarified in numerous places (see comments below). Also, I think it is, too technical and would fit better in a more specialised journal such as Plant Methods.

General comments:

---

1- The English should be improved

We have used professional English edition to improve the language.

2- The scope in the text is varying a lot between sections, which makes the reading hard. Sometimes the text provide very precise information about a given experiment (e.g. line 59), while it stays very vague in other places. I think the whole text should be homogenised for easier understanding.

We have done a major rewriting to address this issue

3- The manuscript given the impression to be willing to make an overview of whole the existing sensors / algorithms used for plant image analysis. My feeling is that this tack is inherently huge, since each image acquisition / analysis problem will call for a specific solution. A thorough review would be enormous. This is not the case f this manuscript, which gives more of an overview.

We have addressed this problem by giving the major advantages/drawbacks and technical characteristics of image acquisition devices and image analysis procedures.

Some specific comments, to give an idea of the modifications that should be made (I haven't done the whole document):

---

4- Line 19 (first line of the abstract!): No, phenomics is not the field of atomic phenotype acquisition technologies. It is the field of phenome analysis and is not, strictly speaking, linked to any specific technology. Phenomics can be done by hand, with a ruler.

We agree with the referee and we have changed the formulation of the abstract.

5- Line 30: NDVI is not defined

We have defined NDVI and other abbreviations throughout the manuscript

6- line 41: the sentence discusses roots techniques, but cites shoot-related article

We have corrected this part by rewriting. The references in the previous manuscript( 9- 12 now 11- 13 were correct and did refer to roots

7- line 41: what do you mean by "Analysis of direct imaging"?

We have changed the phrase as we refer to extraction of quantitative data from images (now line 42-43

8- line 44: I guess that author mean growing setups

We have corrected it (now line 46)

9- line 47-67: I am not sure to understand the aim of this paragraph. How does this fit with the rest of the text? I have the feeling it justifies to use of reporter lines, not the

use of imaging setups...

We have rewritten part of the paragraph to explain why. In principle reporter genes, specifically Green Fluorescent Protein and Luciferase fostered the use of artificial vision systems early on. (now 49-76)

10- line 67: why is drawback in crops?

We have clarified this point. Now line 72-76

11- Monovision: can't the infrared and fluorescence imaging setup be classified here? They would fit the definition given in line 101-103.

Although there are IR cameras acquiring a single wavelength most are RGB-IR so we have included this in the multispectral cameras section. (see lines 194-211)

12- 113: "developed to quantify QTL's" ->

We have corrected to "developed to identify QTL's" Now line 146

13- 114: "large POPULATION of RIL's"

This part was rewritten

14- 115: what do you mean by "elite lines"?

This part was rewritten (line 148). An elite line is a genetic line useful for further breeding. Usually they have pyramided QTLs and or dominant alleles conferring superior traits sought after.

15- 123: isn't it a "DEPTH map"?

The mistake is corrected. Deep map is replaced by depth map. (Line 168)

16- 125: ToF is not defined

We have added a complete description of ToF devices-(line 228-249)

17- 134: why are stereo vision low throughput? Not sure it is true. Many plant phenotyping platform have a stereo vision imaging inside the imaging cabinet for 3D reconstruction -> high throughput

We have eliminated that text and added a paragraph with merits and drawbacks of 3-D systems. (Line 182-190)

Figure 1: What do the two arrows mean?

We have remade Figure 1 that describes the process of image acquisition and analysis

Reviewer #2: Due to the diversity of plant phenotyping techniques and different goals of plant research, it is a challenge to review and summarize major works enrolled in plenty of imaging techniques, image analysis pipeline, and image processing algorithms. The authors attempt to review some efforts of images acquisition and image processing, which is encouraged. However, the structure of review is confused, and massive fundamental knowledge of images analysis (read like a textbook of digital image processing) exists in this main text, which also lacks the references and the authors' own opinions. In addition, more applications of plant phenotyping should be cited in this review. More discussions and more comparisons with different image analysis should be summarized and added combined with the authors' suggestions, which can guide and benefit the readers.

1.Line 3: I wonder this review whether focus on plant phenomics, if yes, please change the title to plant phenomics.

We have changed the title as suggested

2.Line 30: please use the full name of "NDVI" and other abbreviations for the first time in this article.

We have modified all abbreviations and introduced first the name.

We have rewritten the complete part to make it easier to read, and deleted the part on different indexes. We have kept Figure 2 and on Table 2 different indexes can be

found.

3.Line 33: please add reference for the "analyse plant growth and biomass".  
We have added a reference (Myneni et al Nature 1997) (Line 34, reference [2].

4.Line 41: what dose "direct imaging" mean?

We have changed the phrase as we refer to extraction of quantitative data from images (Line 42-43)

5.Line 48-52: please add references for the "Historically, the first type of screenings was developed using the Luciferase reporter gene driven by a promoter" and "Upon mutagenesis of a parental line harbouring a regulatory region activated or repressed by a certain biological process or an environmental condition, new germplasm has been recovered".

We have increased this part and included more references

6.line 69-72: The authors paid plenty of words to introduce the development of screening techniques in the second paragraph of the Background. However, why the purpose of this review is lacking. Why review of image acquisition and image analysis is needed?

This is a very good point, we have made a statement about this, as most literature about image processing is found in books describing how to do them and not as reviews about what to use and why. (Line 78-88)

7.Line 81: TDI is a new sensor? Or it is a new imaging technique with CCD?

TDI is not a new sensor; it is a special imaging acquisition technology that can be implemented over CCD or CMOS imaging sensors to improve their features. Currently it is possible to find TDI cameras in the portfolios of the most important cameras manufactures. We have modified the paragraph and included new references (Lines 102-108).

8.Line 77-93: please add references and add author's own opinion, instead of some general knowledge.

We have added some perspective about trends in all the types of cameras we have described (see last paragraph of each of the devices.

9.Line 96: five groups?

We have increased them to 7. This is a good point as it gives a clearer picture.

10.Line 105: please use the full name of "SPICY" for the first time.

We have corrected this throughout the paper

11.Line 99: "mono vision" should be changed to "mono RGB vision".

We have done this correction (now line 130 and following parts)

12.Line 121-123: please add reference for the "Basically, and after locating a point in two mono vision systems, it is possible to compute the distance from the point to the system. Images produced are known as deep maps".

We have added references

13.Line 125: please use the full name of "ToF" for the first time

We have corrected this point.

14.Line 134: the drawback of stereo vision system is low throughput, however, the author cited a reference "high-throughput stereo-vision system" in line 130.

We have corrected this and clarified it (line 192-190)

15.Line 138-139: "usually between 2 and 10?" please add reference.

This range that classify the multispectral cameras is changing along the last decade as technology is improved. We have found different manufacturers with multispectral cameras between 3 until 25 bands. We have added a reference for a multispectral camera with 25 bands. But in months, new cameras will be in the market with increased capacities. (Line 194-202).

16.Line 156: the citing of "Figure 2" appeared earlier than Figure 1. Please check it carefully.

We have corrected this (line 222)

17.Line 160-163: please add references.  
18.Line 167-169: please add references.  
19.Line 173-177: please add references.

20.Line 178-181: More applications of plant phenotyping with LIDAR in recent years should be cited. Please discuss the disadvantage of the LIDAR.  
21.Line 177: the end of the sentence lacks punctuation.  
We have rewritten this whole part and included new references

22.Line 186: "14.000 nm" should be change to "14,000 nm". The image which obtained by thermographic camera should include a range of wavelength. Moreover, please add the reference.  
We have added the reference. We have added fluorescence imaging with the corresponding ranges and references (line 297-322)

23.Line 196: "as a result of UV light excitation" is not rigorous, and please add the reference.  
We have rewritten this part (see above line 397-322)

24.Line 75-203: more image acquisition techniques, such as x-ray CT, should be added. And the authors should summarize the merit and drawback of these imaging techniques.

25.Line 227-229: please add the reference of the "In fact, when information is measured as entropy, pre-processing causes a decrease in entropy". Or this is the author's own opinion.  
We have rewritten this entire section

26.Line 235-265: please introduce the procedures of image correction and images enhancement more concisely, and please add the reference.  
We have rewritten this entire section

27.Line 271-272: please add the references to the "Leaf Area Index (LAI), biomass, chlorophyll concentration, photosynthetic activity", respectively.  
28.Line 287: please add the references to the "RDVI" and "MSR".  
29.Line 294: what "NIR" and "VIS" represented?  
30.Line 301: "EVI (enhanced vegetation index)" should be changed into "enhanced vegetation index (EVI)". Please check the similar mistake carefully in the main text.  
31.Line 305: you should add the meaning of "RED" and "BLUE".  
32.Line 267-312: the summarization of indexes in Table 1 is appreciated. But the "Vegetation indexes" part may not be appropriate for the "Image pre-processing" part, and this part is too redundant.  
33.Line 320: 3D or 3-D.  
34.Line 336-337: please add the references of the "1500-1590 nm" and "1390-1430 nm".  
35.Line 355: Despite RGB and HSV colour space, other colour components such as ExG are also frequently used in plant detection. The authors should introduce more colour components.  
36.Line 359-360: please add the references of the "hue can discriminate to detect chlorophyll".  
37.Line 368: what is the meaning of "h(.)"?  
38.Line 394: please add the references of the "Gaussian Mixture Model (GMM)". And what is the meaning of "l"?  
39.Line 474: what are the meaning of "(892-934)" and "(281-245)"?  
40.Line 476: 28 in SURF?  
41.Line 487: please use the full name of "FAST" for the first time.  
42.Line 442-517: The authors give too much detail about the features. Little was introduced about the application of these features in plant phenotyping.  
43.Line 538-544: The authors should give some suggestion about when to select supervised/unsupervised techniques.  
44.Line 545-547: I agree that the selection of ML algorithm require actual experimentation for optimal results. However, there are some general advices, the author should mention that and give some suggestions.

We have rewritten this part to make it more accessible. As a result, all the comments have been taken into account

|                                                                                                                                                                                                                                                                                                                                                                                                                                                                                                                          |                                                                                                                                                                                                                                                                                                                                                                                                                                                                                  |
|--------------------------------------------------------------------------------------------------------------------------------------------------------------------------------------------------------------------------------------------------------------------------------------------------------------------------------------------------------------------------------------------------------------------------------------------------------------------------------------------------------------------------|----------------------------------------------------------------------------------------------------------------------------------------------------------------------------------------------------------------------------------------------------------------------------------------------------------------------------------------------------------------------------------------------------------------------------------------------------------------------------------|
|                                                                                                                                                                                                                                                                                                                                                                                                                                                                                                                          | <p>45. According to the Figure 1, the author should review some popular algorithm or software of data analysis. And the structure of image analysis in the main text is confused, and the author should reorganize the review via the workflow of Figure 1.</p> <p>We have remade Figure 1 to make it clearer and matched the review with the Figure. We think that data analysis is a completely different topic. We have table 3 with popular software for image analysis.</p> |
| <b>Additional Information:</b>                                                                                                                                                                                                                                                                                                                                                                                                                                                                                           |                                                                                                                                                                                                                                                                                                                                                                                                                                                                                  |
| <b>Question</b>                                                                                                                                                                                                                                                                                                                                                                                                                                                                                                          | <b>Response</b>                                                                                                                                                                                                                                                                                                                                                                                                                                                                  |
| Are you submitting this manuscript to a special series or article collection?                                                                                                                                                                                                                                                                                                                                                                                                                                            | No                                                                                                                                                                                                                                                                                                                                                                                                                                                                               |
| <p><b>Experimental design and statistics</b></p> <p>Full details of the experimental design and statistical methods used should be given in the Methods section, as detailed in our <a href="#">Minimum Standards Reporting Checklist</a>. Information essential to interpreting the data presented should be made available in the figure legends.</p> <p>Have you included all the information requested in your manuscript?</p>                                                                                       | No                                                                                                                                                                                                                                                                                                                                                                                                                                                                               |
| <p>If not, please give reasons for any omissions below.</p> <p>as follow-up to "<b>Experimental design and statistics</b></p> <p>Full details of the experimental design and statistical methods used should be given in the Methods section, as detailed in our <a href="#">Minimum Standards Reporting Checklist</a>. Information essential to interpreting the data presented should be made available in the figure legends.</p> <p>Have you included all the information requested in your manuscript?</p> <p>"</p> | Not applicable                                                                                                                                                                                                                                                                                                                                                                                                                                                                   |
| <p><b>Resources</b></p> <p>A description of all resources used, including antibodies, cell lines, animals and software tools, with enough information to allow them to be uniquely identified, should be included in the Methods section. Authors are strongly encouraged to cite <a href="#">Research Resource Identifiers</a> (RRIDs) for antibodies, model organisms and tools, where possible.</p>                                                                                                                   | Yes                                                                                                                                                                                                                                                                                                                                                                                                                                                                              |

|                                                                                                                                                                                                                                                                                                                                                                                                                                                                                                                                                         |            |
|---------------------------------------------------------------------------------------------------------------------------------------------------------------------------------------------------------------------------------------------------------------------------------------------------------------------------------------------------------------------------------------------------------------------------------------------------------------------------------------------------------------------------------------------------------|------------|
| <p>Have you included the information requested as detailed in our <a href="#">Minimum Standards Reporting Checklist</a>?</p>                                                                                                                                                                                                                                                                                                                                                                                                                            |            |
| <p><b>Availability of data and materials</b></p> <p>All datasets and code on which the conclusions of the paper rely must be either included in your submission or deposited in <a href="#">publicly available repositories</a> (where available and ethically appropriate), referencing such data using a unique identifier in the references and in the “Availability of Data and Materials” section of your manuscript.</p> <p>Have you have met the above requirement as detailed in our <a href="#">Minimum Standards Reporting Checklist</a>?</p> | <p>Yes</p> |

1 **Gigascience Review**

2

3 **Plant phenomics: an overview of image acquisition technologies and**  
4 **image data analysis algorithms**

5 Fernando Perez-Sanz<sup>1</sup>, Pedro J. Navarro<sup>2</sup>, Marcos Egea-Cortines<sup>2</sup>

6

7

8 <sup>1</sup>Genetics, ETSIA, Instituto de Biotecnología Vegetal, Universidad Politécnica de

9 Cartagena, 30202 Cartagena, Spain

10 <sup>2</sup>DSIE, Universidad Politécnica de Cartagena, Campus Muralla del Mar, s/n. Cartagena

11 30202, Spain

12 email- Fernando Perez-Sanz- fernando.perez8@um.es; Pedro J. Navarro

13 pedroj.navarro@upct.es

14 Correspondence Marcos Egea-Cortines marcos.egea@upct.es

15



16

## 17 Abstract

18

19 The study of phenomes or phenomics has been a central part of biology. The field of  
20 automatic phenotype acquisition technologies based on images has seen an important  
21 advance in the last years. As other high throughput technologies, it bears from a  
22 common set of problems, including data acquisition and analysis. In this review, we  
23 give an overview of the main systems developed to acquire images. We give an in-depth  
24 analysis of image processing with its major issues, and the algorithms that are being  
25 used or emerging as useful to obtain data out of images in an automatic fashion.

26

27 **Keywords:** algorithms; artificial vision; deep learning; hyperspectral cameras; machine  
28 learning; segmentation

## 29 Background

30

31 The development of systems to monitor large fields using Normalized Difference  
32 Vegetation Index (NDVI), started a long successful career over 25 years ago when  
33 NDVI was used in the so-called remote sensing field [1]. It was an important milestone  
34 in the advance of automatic methods for analysing plant growth and biomass [2]. Ever  
35 since, new technologies have increased our capacity to obtain data from biological  
36 systems. The ability to measure chlorophyll status from satellite images allowed plant  
37 health to be measured in large fields and predict crops and productivity in very large  
38 areas such as the Canadian prairies, Burkina Faso or the Indian Basin in Pakistan [3–6].  
39 Thus, the field of remote sensing is an important basis where knowledge about data  
40 acquisition and analysis started. The development of phenotyping devices using local  
41 cameras for crops took off using an array of technologies including Infrared  
42 thermography to measure stomatal opening or osmotic stress [7–9]. Extraction of  
43 quantitative data from images has been developed to study root development [10–12],  
44 and has found a niche to identify germplasm resistant to abiotic stresses in plants such  
45 as cereals [13], Arabidopsis [14] and for large-scale field phenotyping [15]. There are  
46 several recent reviews addressing the different types of growing setups [16–22], and we  
47 will not cover them in the current review.

48

1  
2  
3  
4  
5  
6  
7  
8  
9  
10  
11  
12  
13  
14  
15  
16  
17  
18  
19  
20  
21  
22  
23  
24  
25  
26  
27  
28  
29  
30  
31  
32  
33  
34  
35  
36  
37  
38  
39  
40  
41  
42  
43  
44  
45  
46  
47  
48  
49  
50  
51  
52  
53  
54  
55  
56  
57  
58  
59  
60  
61  
62  
63  
64  
65  
66  
67  
68  
69  
70  
71  
72  
73  
74  
75  
76  
77

The development of reporter genes allows the external visualization of gene expression, sometimes in a non-invasive way. This led to the development of high throughput image acquisition devices to study gene expression. The use of high-throughput screening systems based on imaging techniques had a major impact in the identification of mutants involved in different processes [23]. Historically, the first type of screenings were developed using the Luciferase reporter gene driven by an endogenous promoter [24]. Upon mutagenesis of a parental line harbouring a regulatory region activated or repressed by a certain biological process or an environmental condition, new germplasm has been recovered [25]. This allowed the identification of a large number of mutants affecting complex traits such as response to abiotic stress [26] or circadian clock [27]. A second type of analysis based on measuring growth helped identify genes involved in chloroplast function [28]. Further studies using promoters driving a reporter gene have been used in Bryophytes such as *Physcomitrella patens*, or the unicellular green Algae *Chlamydomonas reinhardtii* to study circadian regulation [29,30]. Complex screens have been set up for instance to identify the formation of Cajal bodies in nuclei using alternatively spliced Green Fluorescent Protein (GFP) protein variants [31]. Once promoter driven lines are established they can be reused for further studies. A screen of 720 chemical compounds performed in Arabidopsis plants with a GIGANTEA promoter driving luciferase identified compounds that affect circadian clock and cause actin stabilization, an otherwise difficult parameter to measure [32]. Altogether, these screens have proven the importance of unbiased image acquisition systems, demonstrating the universal power of this approach for in-depth research in plants. Those studies based on transgenic material have been extensively used model systems such as Arabidopsis, *Physcomitrella* or *Chlamydomonas*. However transgenic-based studies present a major drawback for most crops, as the size of the plants makes them difficult to use for high throughput studies using reporter genes. Finally, image acquisition from large plants is challenging as growth chambers and setups need to be built for this purpose.

78  
79  
80  
81  
82

The two aforementioned situations i.e. field and growth chamber setups have in common the large number of images produced when using automatic image acquisition technologies. Two main aspects to consider are the type of image acquired and how to process it. There are a number of recent reviews on phenomics and high-throughput image data acquisition [15,33–36]. In contrast, the majority of the literature concerning

1  
2  
3  
4  
5  
6  
7  
8  
9  
10  
11  
12  
13  
14  
15  
16  
17  
18  
19  
20  
21  
22  
23  
24  
25  
26  
27  
28  
29  
30  
31  
32  
33  
34  
35  
36  
37  
38  
39  
40  
41  
42  
43  
44  
45  
46  
47  
48  
49  
50  
51  
52  
53  
54  
55  
56  
57  
58  
59  
60  
61  
62  
63  
64  
65

83 image processing and analysis is found in books where methods are described in detail  
84 [37–41]. There are some very good reviews on aspects of data acquisition and analysis  
85 i.e. imaging techniques [42], Machine Learning (ML) for high throughput phenotyping  
86 [43] or software for image analysis [44], but a detailed review on different type of data  
87 analysis is lacking. In this review, we cover the current and emerging methods of image  
88 acquisition and processing allowing image-based phenomics (Figure 1).  
89

## 90 Review

### 91 Image acquisition

92  
93 Image acquisition is the process through which we obtain a digital representation of a  
94 scene. This representation is known as image and its elements are called pixels (picture  
95 elements). The electronic device used to capture a scene is known as imaging sensor.  
96 CCD (charge-coupled device) and CMOS (complementary metal oxide semiconductor)  
97 are the most broadly used technologies in image sensors. A light wavelength is captured  
98 by small analogic sensors, which will acquire major or minor charge depending on the  
99 amount of incident light. These signals are amplified, filtered, transported and enhanced  
100 by means of specific hardware. A suitable output interface and a lens in the same  
101 housing is all that it is needed to perform image acquisition. The elements enumerated  
102 above conform the main element of computer vision systems, the camera. Time delay  
103 and integration (TDI) is an imaging acquisition mode that can be implemented over  
104 CCD [45] or CMOS [46]. It improves the features of the image acquisition system  
105 considerably. TDI is used in applications that require the ability to operate in extreme  
106 lighting conditions, requiring both high speed and high sensitivity, for example: inline  
107 monitoring, inspection, sorting, and remote sensing (for weather o vegetation  
108 observation) [46].

109 The aforementioned technologies, CCD, CMOS and TDI confer unique characteristics,  
110 which define the type of data a camera can provide with a degree of robustness. There  
111 are fundamental differences in the type of performance the different sensors offer. In the  
112 last years CMOS technology, has outperformed CCDs in most visible imaging  
113 applications. When selecting an imaging sensor (a camera), CCD technology causes less  
114 noise and produces higher quality images, mainly in scenes with bad illumination. They  
115 have a better depth of colour due to their higher dynamic range. On the other hand, the

116 CMOS sensors are faster at processing images. Due to the hardware architecture for  
117 pixel extraction, they need less electrical power to operate, they allow a Region of  
118 Interest (ROI) to be processed on the device and are cheaper than CCDs. Furthermore,  
119 TDI mode with CCD or CMOS imaging sensors is used for high speed and low light  
120 level applications [47]. The latest technological developments in cameras show that the  
121 trend of the manufacturers such as IMEC, world-leader in nanoelectronics, is to fuse  
122 TDI technology with the CCD and CMOS characteristics in the same device [48]. TDI  
123 technology is expected to be applied to high throughput phenotyping processes in the  
124 nearby future.

125  
126 The field of image acquisition is extremely developed with considerable literature but  
127 image acquisition systems can be classified into seven groups that are suitable for  
128 phenotyping.

129

### 130 1. Mono-**RGB** vision

131

132 **Mono-**RGB**** vision systems are composed of a set comprising a lens, imaging sensor,  
133 specific hardware and IO interface. Depending if they use a line or matrix of pixels,  
134 they are classified in line cameras (or scanners) and matrix cameras. Most computer  
135 vision phenotyping devices are based on **mono-**RGB**** vision systems. Examples of  
136 mono-**RGB** vision devices include “**Smart tools for Prediction and Improvement of**  
137 **Crop Yield (SPICY)**”, an automated phenotyping prototype of large pepper plants in the  
138 greenhouse. The system uses multiple **RGB** cameras to extract two types of features:  
139 features from a 3D reconstruction of the plant canopy and statistical features derived  
140 directly from **RGB** images [49]. A different approach has been used with two cameras  
141 inside a growth chamber to measure **circadian growth features** of *Petunia*, *Antirrhinum*  
142 and *Opuntia* [50]. **Two cameras with low and high magnifications were used to carry-**  
143 **out phenotype studies of *Arabidopsis thaliana* seeds. The system is mounted on a three-**  
144 **axis gantry and the rotation of the samples allow the gravitropic bending response to be**  
145 **determined in the roots and its posterior quantification [51].** Recently a high-throughput  
146 **RGB** system has been developed to **identify Quantitative Trait Loci (QTL)** involved in  
147 yield in large recombinant inbred lines in maize [52], demonstrating the increasing  
148 impact of this approach in **phenomics**.

149 These devices have excellent spatial and temporal resolution, i.e. they can produce a  
150 very large number of images in very short periods and at a very low cost. They are  
151 portable and there are many software tools to perform image processing (Table 1).  
152 Systems based on mono-RGB vision allow a quantification of the plant canopy [53], as  
153 well as sufficient computation of vegetation indices, for most purposes. The main  
154 disadvantages are caused by the overlap of plant organs during growth and nutation  
155 phases and the relative position of the organs with respect to the device that makes the  
156 precise quantification difficult. In addition, these devices are affected by variations in  
157 illumination when used outdoors. The trend in outdoor plant phenotyping is to combine  
158 mono-RGB systems with other systems such as Light Detection and Ranging LIDAR  
159 devices (see below), thermal imaging or adding new bands or filters to the camera that  
160 allow the segmenting of specific regions of the spectrum [54,55].

## 161 162 2. Stereo vision 163

164 Stereo vision systems try to correct a drawback of mono-RGB vision systems for  
165 distance measurement. The architecture of stereo vision systems emulates the behaviour  
166 of human vision using two mono vision systems. Basically, and after locating a point in  
167 two mono vision systems, it is possible to compute the distance from the point to the  
168 system. Images produced are known as depth maps [56]. A stereo vision system has  
169 been used by Biskup and colleagues [57] to obtain structural features of plant canopies.  
170 The 3D reconstruction has been successfully employed to obtain 3-D models of plants,  
171 thus demonstrating the power of this approach [58]. Simple depth reconstructions  
172 helped to define stems, leaves and grapes showing the potential of this technology [59].  
173 A RGB camera mounted on a mobile robot is used as an automated 3D phenotyping of  
174 vineyards under field conditions. Sequentially, the system captures a set of images,  
175 which are used to reconstruct a textured 3D point cloud of the whole grapevine row  
176 [60]. A stereo vision has been developed to perform high throughput analysis of  
177 rapeseed leaf traits. The system uses two identical RGB cameras to obtain stereo images  
178 for canopy and 3-D reconstruction [61]. Developing a 3D-mesh segmentation has  
179 allowed cotton growth to be analysed [62], showing the further possibilities of 3D  
180 imaging.

182 The main advantage of 3-D systems is their simplicity, two cameras are enough to  
183 obtain depth maps. The stereo vision has evolved in multi-view stereo (MSV) and has  
184 found a place in plant phenotyping [63]. Furthermore, the MSV is a low cost 3D image  
185 acquisition system compared with other technologies such as LIDAR or tomography  
186 imaging [64]. Stereo vision systems have important weaknesses. They are affected by  
187 changes of the scene illumination, they need a high performance computational system  
188 to carry out stereo matching algorithms, and they have a poor depth resolution [65].  
189 These limitations are increased in outdoor environments, as image segmentation  
190 becomes more challenging.

### 191 192 3. Multi and hyper spectral cameras

193  
194 The multispectral and hyperspectral cameras have been used in numerous fields of  
195 science and in industrial applications [66–71]. The spectral resolution is the main factor  
196 that distinguishes multispectral imagery from hyperspectral imagery [72]. Multispectral  
197 cameras are devices able to capture images from a number of discrete spectral bands.  
198 The number of bands has increased in the last decade as technology has improved.  
199 Currently, the main camera manufacturers offer multispectral cameras acquiring  
200 between three and twenty five bands, including the visible RGB channels, Near Infra-  
201 Red (NIR) or a set of custom bands, with a tendency to provide increasing number of  
202 bands [73]. The spectral bands may not be continuous, thus for one pixel we obtain a  
203 vector of information comprising the number of elements corresponding to the number  
204 of bands registered. Hyperspectral systems may reach resolutions of a few nanometers  
205 in wavelength, obtaining for each pixel a digital signature that may contain several  
206 hundreds of continuous bands within a specific range of wavelengths [74].  
207 Traditionally, both multispectral and hyperspectral imaging have been used for remote  
208 sensing and have an increased number of applications in phenomics. A multispectral  
209 system has been developed to improve the original colour of images for fruit  
210 recognition [75]. The authors fused the original colour image with an infrared image  
211 using the nonlinear Daubechies wavelet transform (DWT). Thus, the additional  
212 information from a second image allows the original one to be improved.

213  
214 The use of hyperspectral cameras is increasing in phenotyping experiments as they  
215 allow the identification of physiological responses, pathologies or pests in a non-

1  
2  
3  
4  
5  
6  
7  
8  
9  
10  
11  
12  
13  
14  
15  
16  
17  
18  
19  
20  
21  
22  
23  
24  
25  
26  
27  
28  
29  
30  
31  
32  
33  
34  
35  
36  
37  
38  
39  
40  
41  
42  
43  
44  
45  
46  
47  
48  
49  
50  
51  
52  
53  
54  
55  
56  
57  
58  
59  
60  
61  
62  
63  
64  
65

216 invasive way. Using hyperspectral images, a system has been developed to identify  
217 pathogens in barley leaves using probabilistic topic models [76]. A hyperspectral  
218 microscope was used to determine spectral changes on the leaf and cellular level of  
219 barley (*Hordeum vulgare*) during resistance reactions against powdery mildew  
220 (*Blumeria graminis f.sp. hordei, isolate K1*) [77]. A detailed description of the different  
221 wavelengths and combinations used in multispectral and hyperspectral cameras can be  
222 seen in Figure 2, and their uses in Table 2. We expect to see an increase in phenomic  
223 setups using multispectral and hyperspectral cameras in the future. An emerging issue  
224 will be the data analysis as the number of pictures doubles with each additional  
225 spectrum used for analysis (see below).

226

#### 227 4. ToF cameras

228

229 The Time of Flight cameras or ToF cameras have been one of the last imaging devices  
230 to be incorporated into automatic plant phenotyping [78]. ToF has as a general principle  
231 the measurement of the distance between the objective of the camera and each pixel.  
232 This is achieved measuring the time it takes for a signal emitted in NIR to come back,  
233 reflected by the object. This allows a precision 3D reconstruction. Stereo vision coupled  
234 with ToF images have been implemented to increase the performance of methods of  
235 image segmentation to obtain leaf areas [79]. Beyond the tedious hand work required  
236 for manual analysis sampling is done in a non-destructive way. Depth maps obtained by  
237 a ToF camera together with colour images are used to carry out the 3D modelling of  
238 leaves. The system is mounted on a robotic arm which allows image acquisition to be  
239 automated [80]. A ToF has been successfully used to identify QTL regulating shoot  
240 architectures of *Sorghum* by mean of 3D reconstruction [81].

241 Microsoft Kinect is a low cost image acquisition system designed for video gaming  
242 which can be used for characterization and for tracking of phenological parameters [82].  
243 The device is composed of an infrared projector and camera that generates a grid from  
244 which the location of a nearby object in 3 dimensions can be ascertained [83]. Kinect  
245 has been used to measure plant structure and size for two species growing in California  
246 grassland [84]. The quantitative 3D measurements of the architecture of the shoot and  
247 structure of the leaves can be performed when proper segmentation algorithms are  
248 developed suggesting some potential for ToF systems [85].

249

1 250 The main disadvantages of this acquisition system are the low resolution, a reduced  
2 251 distance range of a few meters and the high dependence on the reflecting surface for  
3 252 imaging. As a result, they cannot operate under strong sunlight and are more appropriate  
4 253 for indoor conditions. Its reduced cost and the possibility of obtaining 3D structures of  
5 254 entire plants, as well as of individual organs make these devices very attractive for  
6 255 indoor phenotyping.

7 256

## 8 257 5. LIDAR technology

9 258

10 259 Light Detection and Ranging (LIDAR) is a remote sensing technology developed at the  
11 260 beginning of the 70s to monitor the Earth's Surface [86]. LIDAR uses a laser pulse light  
12 261 to measure the distance between the light source and the object by calculating the time  
13 262 of emission and time of reflected light detection. It allows the creation of a cloud of  
14 263 points that reconstruct the 3D structure of an object [87,88]. LIDAR has been used in  
15 264 image acquisition from distances of thousands of kilometres to centimetres,  
16 265 demonstrating the great potential of these type of devices. Satellite-based LIDAR  
17 266 systems are used for the measurements of vegetation canopy height, area, volume or  
18 267 biomass, etc. [89–91]. Recent development using both manned and unmanned flights  
19 268 have allowed the estimation of biomass dynamics of a coniferous forest using Landsat  
20 269 satellite images together with ground and airborne LIDAR measurements  
21 270 [92]. Terrestrial LIDAR sensors are applied to detect and discriminate maize plants and  
22 271 weeds from soil surface [93]. Short range LIDAR can be deployed for high-throughput  
23 272 phenotyping (HTP) systems for cotton plant phenotyping in the field [94] or tomato leaf  
24 273 area by 3-D laser reconstruction [95]. Fully automated crop monitoring is feasible using  
25 274 centimetre ranges from robotized or gantry systems [53]. An autonomous robotic  
26 275 system has allowed 3D mapping of plant structures to be performed with millimetric  
27 276 precision [96]. A LASER SCAN mounted on a XYZ gantry system was used to  
28 277 estimate the growth measures and structural information of plants through laser  
29 278 triangulation techniques [97]. Thus, using different devices LIDAR has an impressive  
30 279 range of possibilities for plant phenomics.

31 280

32 281 Some shortcomings of LIDAR devices for plant phenotyping are the absence of colour  
33 282 in the measurement, excessive time to compute the cloud points, low precision for  
34 283 massive phenotyping, scanning noises caused by wind, rain, insects, small particles in



1  
2  
3  
4  
5  
6  
7  
8  
9  
10  
11  
12  
13  
14  
15  
16  
17  
18  
19  
20  
21  
22  
23  
24  
25  
26  
27  
28  
29  
30  
31  
32  
33  
34  
35  
36  
37  
38  
39  
40  
41  
42  
43  
44  
45  
46  
47  
48  
49  
50  
51  
52  
53  
54  
55  
56  
57  
58  
59  
60  
61  
62  
63  
64  
65

the air, and the requirement of calibration. Recent advantages suggest that the use of LIDAR technologies could overcome some of challenges for the next-generation phenotyping technologies [98]. Developments in multispectral LIDAR instruments show novel systems which are capable of measuring multiple wavelengths and of obtaining vegetation indexes (see below) [99,100] or to measure arboreal parameters [101]. The massive adoption of LASER technologies by autonomous car manufactures has fostered the development of 3D High Definition LIDAR (HDL) with real time (RT) capacities. The new 3D HDLs are capable of generating 1.3 million points per second with precisions of 2 cm and distances of up to 120 meters [102]. These new devices open the door to the RT massive phenotyping in outdoor and indoor crops.

6. Thermography and Fluorescence Imaging

Thermography is a widely-used technology in remote sensing and plant phenotyping [103–106]. Thermographic cameras are able to acquire images at wavelengths ranging from 300 to 14,000nm [107], thus allowing the conversion of the irradiated energy into temperature values, once the environmental temperature is assessed. Plants open stomata in response to environmental cues and circadian clock depending on the type of photosynthetic metabolism they have [108,109]. The evapotranspiration can be assessed with thermography [110], and quantification can be made at different scales such as a leaf, a tree, a field or a complete region. Water stress and irrigation management are two fields of application of thermography imaging [111–114]. Thermography imaging can detect local changes of temperature produced due to pathogen infection or defence mechanisms [115]. *Oerke et al.* used a digital infrared thermography to correlate the maximum temperature difference (MTD) of apple leaves with all stages of scab development [116].

Fluorescence imaging has been used in a large number of experimental setups as UV light in the range of 340-360 nm is reflected by different plant components as discrete wavelengths [42]. The corresponding wavelengths emitted are cinnamic acids in the range of green-blue (440-520 nm). Early experiments using reflected fluorescence allowed the identification of phenylpropanoid synthesis mutants in *Arabidopsis* [117]. Chlorophyll fluorescence emits in red and far-red (690-740 nm). It is an important parameter that has been studied as a proxy for different biological processes such as

1  
2  
3  
4  
5  
6  
7  
8  
9  
10  
11  
12  
13  
14  
15  
16  
17  
18  
19  
20  
21  
22  
23  
24  
25  
26  
27  
28  
29  
30  
31  
32  
33  
34  
35  
36  
37  
38  
39  
40  
41  
42  
43  
44  
45  
46  
47  
48  
49  
50  
51  
52  
53  
54  
55  
56  
57  
58  
59  
60  
61  
62  
63  
64  
65

318 circadian clock or plant health [8,118,119]. A system based on a UV light lamp and a  
319 conventional camera provided of a UV-filter to avoid RGB and IR images has been  
320 used to identify changes in UV absorbance related to pollination [120]. Multicolour  
321 fluorescence detection uses the combination of chlorophyll and secondary metabolites  
322 emitted fluorescence to determine plant health in leaf tissues [121].

323  
324 Thermography imaging results in an estimable tool for monitoring of genotypes and  
325 detection of plant diseases [122] where all the specimens are located under strict control  
326 conditions: temperature, wind velocity, irradiance, leaf angle or canopy leaf structures  
327 are potential issues for quality image acquisition. The next generation of thermography  
328 imaging for phenotyping will have to resolve drawbacks related to temporal variations  
329 of environment conditions, aspects relating to angles of view, distance, sensitivity and  
330 reproducibility of the measurements [114]. Both thermographic and fluorescent images  
331 capture a single component and images are in principle easy to analyse as segmentation  
332 based on thresholds can be applied to the acquired images. Combining thermographic  
333 and fluorescent imaging requires sophisticated data analysis methods based on neural  
334 networks to obtain quality data but are an emerging solution [121].

335

## 336 7. Tomography imaging

337  
338 Magnetic Resonance Imaging (MRI) is a non-invasive imaging technique which uses  
339 Radio Frequency (RF) magnetic fields to construct tomographic images [123].  
340 Commonly MRI has been used to investigate the anatomy structure of the body  
341 (especially the brain) in both health and disease [124]. In plant phenomics, MRI is used  
342 to visualize internal structures and metabolites. This method poses a great potential to  
343 monitor physiological processes occurring *in vivo* [125]. MRI has allowed the  
344 development of root systems over time in bean to be mapped [126], moisture  
345 distribution to be visualized during development in rice [127] and the water presence to  
346 be analysed during maturity process of barley grains [128].

347 Positron Emission Tomography (PET) is a nuclear medicine imaging modality that  
348 allows the assessment of biochemical processes *in vivo*, to diagnose and stage diseases  
349 and monitor their treatment [129]. *Karve et al.* [130] presented a study about C-  
350 allocation (Carbon allocation from CO<sub>2</sub> through photosynthesis) in large grasses such as  
351 *Sorghum bicolor*. The study concluded that the commercial PET scanners can be used

1 352 reliably, not only to measure C-allocation in plants but also to study dynamics in  
2 353 photoassimilate transport.

3 354

4 355 X-ray Computed Tomography (X-ray CT) employs X-rays to produce tomographic  
5 356 images of specific areas of the scanned object. The process of attenuation of rays  
6 357 together with a rotation and axial movement over objects produces 3D images [42]. A  
7 358 high throughput phenotyping system based on X-ray CT is ten times more efficient than  
8 359 human operators, being capable of detecting a single tiller mutant among thousands of  
9 360 rice plants [131]. The remarkable penetration of X-rays, has made this technology a  
10 361 great ally of phenotyping carried out below-ground. The study of root systems and their  
11 362 quantification has been a field of habitual application of X-ray CT [132–136]. New  
12 363 developments address the reduction of penetrability and the increase of the image  
13 364 resolution of X-ray CT in plant tissue using phosphotungstate as a contrasting agent,  
14 365 due to its capacity of increasing the contrast and penetrability of thick samples [137].  
15 366

16 367

17 368 MRI, PET and X-ray imaging techniques are available for screening 3-D objects. MRI  
18 369 and PET are two non-destructive and non-invasive scanning technologies that have been  
19 370 applied in plant sciences to acquire 3-D structural information [138]. MRI and PET data  
20 371 acquisition is time consuming, and software tools need to be further developed to  
21 372 analyse data and obtain physiologically interpretable results [107]. High-Resolution X-  
22 373 ray computed tomography (HRXCT) promises to be the broadest non-destructive  
23 374 imaging method used in plant sciences. HRXCT will provide 3-D data at a resolution  
24 375 suited for detailed analysis of morphological traits of *in vivo* plant samples and at a  
25 376 cellular resolution for *ex vivo* samples [138]. From of a point of view of the devices the  
26 377 trend will be to increase the resolution of images, the size of the fields of view, and  
27 378 increase its portability [139].

28 379

## 29 380 Image analysis

30 381

31 382 Extracting information from images is performed through the process of segmentation.  
32 383 The aim of a segmentation procedure is to extract the components of an image that are  
33 384 of interest i.e. object or region of interest from the rest of the image i.e. background of  
34 385 the image or irrelevant components. Thus, we end up with a partitioned image with

1 385 significant regions. The significant regions may be defined as foreground versus  
2 386 background, or by selecting a number of individual components from an image. The  
3 387 construction of the selected regions is based on the image characteristics such as colour  
4 388 (colour spaces), spectral radiance (vegetation indexes), edge detection, neighbour  
5 389 similarity [140] or combinations that are integrated via a machine learning process  
6 390 [141]. In some cases, pre-processing is required in order to obtain a meaningful  
7 391 segmentation.

8 392

9 393

## 10 394 1. Image pre-processing

11 395

12 396 Image preprocessing is an important aspect of image analysis. The aim of image  
13 397 preprocessing is to improve contrast and eliminate noise in order to enhance the objects  
14 398 of interest in a given image [142]. This process can be extremely helpful to enhance the  
15 399 feature extraction quality and the downstream image analysis [143]. Preprocessing can  
16 400 include simple operations such as image cropping, contrast improvement or others  
17 401 significantly more complex such as dimensionality reduction via Principal Component  
18 402 Analysis or Clustering [43]. One preprocessing pipeline has been proposed for plant  
19 403 phenotyping based on converting the image to grayscale, application of a median filter,  
20 404 binarization and edge detection [144]. A similar preprocessing has been developed to  
21 405 identify plant species under varying illumination conditions [145]. It comprises  
22 406 conversion to grayscale, image binarization, smoothing and application of a filter to  
23 407 detect edges. In a comparative study to analyze leaf diseases, histogram equalization  
24 408 was found to be the best way to obtain preprocessing of color images converted to  
25 409 grayscale [146]. However RGB images have been found to perform better than  
26 410 grayscale conversions when identifying leaf pathogens [147].

27 411

28 412 We cannot conclude that a single preprocessing method will outperform other methods.  
29 413 The quality and type of image are fundamental to select a type of preprocessing  
30 414 procedure. Nevertheless, preprocessing is a basic step that can improve image analysis,  
31 415 and sometimes make it possible. It should be described in the materials and methods  
32 416 of image procedures to make data comply the new standards -Findability, Accessibility,  
33 417 Interoperability, and Reusability (FAIR) [148]

34 418

## 419 2. Image segmentation

420

421 As we mentioned above, image segmentation is the core of image processing for  
422 artificial vision-based plant phenotyping. Segmentation allows the isolation and  
423 identification of objects of interest from an image, and it aims to discriminate  
424 background or irrelevant objects [149]. The objects of interest are defined by the  
425 internal similarity of pixels in parameters such as texture, colour, statistic [143], etc.  
426 (See a list of Open software libraries for image segmentation in Table 1).

427

428 One of the simplest algorithms used is threshold segmentation, based on creating groups  
429 of pixels on a grayscale according to the level of intensity, thus separating the  
430 background from targets. Such an approach has been used with Android OS (ApLeaf) in  
431 order to identify plant leaves [150].

432

433 The Otsu's method [151] is a segmentation algorithm that searches for a threshold that  
434 minimizes the weighted within class variance [142]. This method has been used for  
435 background subtraction in a system that records and performs automatic plant  
436 recognition [152], and can give high contrast segmented images in an automatic fashion  
437 [153]. Under certain circumstances, it can underestimate the signal causing under  
438 segmentation, and is significantly slower than other thresholding methods [142].

439

440 The Watershed [154] transformation is a popular algorithm for segmentation. It treats an  
441 image as a topological surface that is flooded, and seed regions are included, usually by  
442 the user. This generates an image with gradients of magnitudes, where crests appear in  
443 places where borders are apparent (strong edges), and causes segmentation to stop at  
444 those points [140]. It has been used to identify growth rate [155], recognition of  
445 partially occluded leaves [66], individual tree crown delineation [156] or leaf  
446 segmentation [157].

447

448 Grabcut [158] is a segmentation algorithm based on graph cut [159]. It is created on  
449 graph theory to tackle the problem of separating an object or foreground from the  
450 background. The user should mark a rectangle (bounding box) surrounding the object of  
451 interest thus defining the outrebound of the box as background [160]. This algorithm  
452 has been tested to extract trees from a figure but it has been successful only with very

1 453 simple backgrounds [161]. More recently Grabcut has been deployed as a segmentation  
2 454 algorithm in a pipeline for plant recognition with multimodal information i.e. leaf  
3 455 contour, flower contour etc [162]. Grabcut loses precision or even fails when pictures  
4 456 have complex backgrounds but is highly precise with simple backgrounds [161,163].  
5  
6

7 457  
8  
9 458 Snakes are a special type of active contour [164], and are used as methods to fit lines  
10 459 (splines) either to open or close edges and lines in an image. These methods have been  
11 460 used for face recognition, iris segmentation and medical image analysis. Within the  
12 461 field of plant phenotyping, there are procedures where active contours are used inside a  
13 462 protocol constructing a vector of features with data of colour intensity, local texture and  
14 463 a previous knowledge of the plant incorporated via Gaussian Mixture Models,  
15 464 previously segmented [165] . These steps give an initial rough segmentation upon  
16 465 which, active contours can operate with a much higher precision.  
17  
18  
19  
20  
21  
22  
23

24 466  
25 467 Active contours have used for plant recognition via images of flowers [166], based on a  
26 468 combination of the algorithm proposed by Yonggang and Karl [167] and the model of  
27 469 active contours without edges [168]. Whilst the work proposed by Minervini et al [165]  
28 470 appears to give significantly better results compared to those of Suta et al [166], the  
29 471 usage of images with a natural background maybe related to the apparent differences in  
30 472 segmentation. Thus, a current problem concerning the comparison of algorithms and  
31 473 procedures lies on the different backgrounds used for image acquisition.  
32  
33  
34  
35  
36  
37  
38

### 39 474 40 475 3. Features extraction

41 476  
42 477 Features extraction constitutes one of the pillars of the identification and classification  
43 478 of objects based on computer vision. Beyond the raw image, a feature is information  
44 479 which is used to resolve a specific computer vision problem. The features extracted  
45 480 from an image are disposed in the so-called “feature vectors”. The construction of  
46 481 feature vectors uses a wide set of methods to identify the objects in an image. The main  
47 482 features are edges, intensity of image pixels [49], geometries [169], textures [165,170],  
48 483 image transformations e.g. Fourier [171], or Wavelet [75,172] or combinations of pixels  
49 484 of different colour spaces [141]. The end goal of feature extraction is to feed up a set of  
50 485 classifiers and machine learning algorithms (see below).  
51  
52  
53  
54  
55  
56  
57  
58  
59  
60  
61  
62  
63  
64  
65

1  
2  
3  
4  
5  
6  
7  
8  
9  
10  
11  
12  
13  
14  
15  
16  
17  
18  
19  
20  
21  
22  
23  
24  
25  
26  
27  
28  
29  
30  
31  
32  
33  
34  
35  
36  
37  
38  
39  
40  
41  
42  
43  
44  
45  
46  
47  
48  
49  
50  
51  
52  
53  
54  
55  
56  
57  
58  
59  
60  
61  
62  
63  
64  
65

487 One system proposed uses a feature vector composed of a combination of RGB and CIE  
488 L\*a\*b\* colour spaces to segment the images captured during the day [141]. The night-  
489 time image segmentation computed a vector composed of statistical features over two  
490 decomposition levels of the wavelet transform using IR images.

491 Iyer-Pascuzzi et al. presented an imaging and analysis platform for automatic  
492 phenotyping to identify genes underlying root system architecture. The authors  
493 employed a set of 16 statistical, geometrics and shape features obtained from 2,297  
494 images from 118 individuals such as median and maximum number of roots, the total  
495 root length, perimeter, depth, among others [173].

496  
497 There are a number of algorithms to identify invariant features detectors and  
498 descriptors. This type of image analysis ensures the detection of points of interest in a  
499 scale and rotation independent manner. This is crucial for camera calibration and for  
500 matching to produce a set of corresponding image points in 3D image reconstruction.  
501 Furthermore, it allows the identification of points of interest even when they change  
502 scale and/or position or situations of uncontrolled illumination, a common issue when  
503 phenotyping plants. The Scale Invariant Features Transforms (SIFT) [174], Speeded-Up  
504 Robust Features (SURF) [175] and the Histograms of Oriented Gradients (HoG) [176]  
505 are algorithms used to extract characteristics in computer vision and they have been  
506 extended to plant phenotyping. Wei et al. [177] presented an image-based method that  
507 automatically detects the flowering of paddy rice. The method uses a scale-invariant  
508 feature transform descriptor, bag of visual words, and a machine learning method. The  
509 SIFT algorithm has been used to combine stereo and ToF images with automatic plant  
510 phenotyping. It can create dense depth maps to identify pepper leaf in glasshouses [79].  
511 SIFT and SURF algorithms have been tested for detecting local invariant features for  
512 obtaining a 3D plant model from a multi-view stereo images [178]. A HoG framework  
513 allows the extraction of a reliable quantity of phenotypic data of grapevine berry using a  
514 feature vector composed of colour information [179].

515  
516 So far, feature extraction is an arduous and difficult task requiring the testing of  
517 hundreds of feature extraction algorithms and a greater number of combinations  
518 between them. This task demands expert skills in different subjects. The success in the  
519 identification does not depend on the robustness of the classification methods, but on  
520 the robustness of the data.

521

#### 522 4. Machine Learning in plant image analysis

523

524 The amount of data generated in current and future phenomic setups with high  
525 throughput imaging technologies has brought the use of Machine Learning (ML)  
526 statistical approaches. Machine Learning is applied in many fields of research [180–  
527 182]. As phenotyping can generate Terabytes of information, ML tools provide a good  
528 framework for data analysis. A list of ML libraries can be found in Table 3. A major  
529 advantage of ML is the possibility to explore large datasets to identify patterns, using  
530 combinations of factors instead of performing independent analysis  
531 [43].

532

533 Among the ML algorithms a predictive model of regression has been used to phenotype  
534 *Arabidopsis* leaves, based on geometric features as training dataset [169]. Three  
535 different algorithms were tested, k Nearest Neighbour (kNN), Support Vector Machine  
536 (SVM) and Naïve Bayes to segment *Antirrhinum majus* leaves. Colour images have as a  
537 characteristic vector intensity in the RGB and CIE L\*a\*b\*, while the NIR vector is  
538 obtained with the wavelet transform. The best results were obtained with kNN for  
539 colour images and SVM for NIR. This shows that segmentation has several components  
540 as mentioned before including the wavelength of image acquisition [141].

541

542 As the specific wavelength used for image acquisition plays a key role in the type of  
543 data obtained, hyperspectral cameras are becoming important tools, however, hyper  
544 images can be in the order of Gbites of size, making ML a necessity. Examples of  
545 coupling hyperspectral and thermal imaging with ML have allowed the early detection  
546 of stress caused by *Alternaria* in Brassica [183]. The best image classification was  
547 obtained doing a second derivative transformation of the hyperspectral images together  
548 with a back propagation of neural networks allowing the identification of fungi on  
549 leaves days after infection [183].

550

551 A current concept derived from ML is Deep Learning (DL) comprising a set of  
552 algorithms aimed to model with a high level of abstraction. This allows the  
553 development of complex concepts starting from simpler ones, thus getting closer to the  
554 idea of Artificial Intelligence (AI) ([www.deeplearningbook.org](http://www.deeplearningbook.org)). Convolutional Neural



1  
2  
3  
4  
5  
6  
7  
8  
9  
10  
11  
12  
13  
14  
15  
16  
17  
18  
19  
20  
21  
22  
23  
24  
25  
26  
27  
28  
29  
30  
31  
32  
33  
34  
35  
36  
37  
38  
39  
40  
41  
42  
43  
44  
45  
46  
47  
48  
49  
50  
51  
52  
53  
54  
55  
56  
57  
58  
59  
60  
61  
62  
63  
64  
65

555 Networks (CNN), are an example of DL derived of Artificial Neural Networks (ANN).  
556 These multi-layered networks are formed by a layer of neurons that work in a  
557 convolutional way reducing the sampling process and end with a layer of perception  
558 neurons for final classification [184]. Recently DL has been implemented using a CNN  
559 to automatically classify and identify different plant parts [185], thus obtaining both  
560 classification and localization that significantly improve the current methods. A CNN  
561 has been used to detect plant pathogen attacks [186]. Although the training period is  
562 computationally heavy, requiring several hours of CPU clusters, classification was  
563 performed in less than one second [186]. Nevertheless, DL is a step forward in ML and  
564 has great potential to allow the management and analysis of the data produced in  
565 phenomic experiments.

566  
567 Although direct testing maybe the best way to determine the superior algorithm in each  
568 case, there is a number of examples that may guide initial approaches [43,187,188]. As  
569 a general rule discriminating methods such as SVM, ANN, K-NN, give better results in  
570 large datasets that are labelled [43]. Generative methods such as Naive Bayes, Gaussian  
571 Mixture Models, Hide Markov Models, give better results with smaller datasets, both  
572 labelled and unlabelled. The use of unsupervised algorithms i.e. k-means may help  
573 identify unexpected characteristics on a dataset. As mentioned above, preprocessing  
574 plays a fundamental role in increasing the ML output.

575

## 576 Conclusions and future prospects

577

578 The implementation of phenomic technologies is a welcome change towards  
579 reproducibility and unbiased data acquisition in basic and applied research. A successful  
580 approach requires integrating sensors, with wavelength and image acquisitions that will  
581 allow the proper identification of the items under analysis. The majority of the work has  
582 been made in indoor-setups where reasonable conditions can be created to obtain high  
583 quality images, amenable to further processing. The difficulty in outdoor setups  
584 increases as a result of limitations in the actual image acquisition devices and the  
585 uncontrolled conditions that directly affect image quality. The new technologies such as  
586 the high definition LIDAR or the multi-hyperspectral cameras have a great potential to  
587 improve in the near future, specially in outdoor environments.

588

1  
2  
3  
4  
5  
6  
7  
8  
9  
10  
11  
12  
13  
14  
15  
16  
17  
18  
19  
20  
21  
22  
23  
24  
25  
26  
27  
28  
29  
30  
31  
32  
33  
34  
35  
36  
37  
38  
39  
40  
41  
42  
43  
44  
45  
46  
47  
48  
49  
50  
51  
52  
53  
54  
55  
56  
57  
58  
59  
60  
61  
62  
63  
64  
65

589 The pre-processing and segmentation data are two aspects of data treatment and  
590 acquisition that require careful design in order to avoid distortions and reproducibility  
591 [148]. As images are machine-produced data, but image types and processing  
592 procedures may be very different, the standardization of image capture, preprocessing  
593 and segmentation may play an important role. It is a matter of time that databases with  
594 raw image will become part of the standard in phenomics using images very much like  
595 NCBI or Uniprot play a key role in genomic and proteomic projects. With the decrease  
596 in price of hyperspectral devices, new experiments may be performed that produce even  
597 larger data sets, and these data sets will have to go through Artificial Intelligence-based  
598 data analysis in order to give the researchers results interpretable by humans. We guess  
599 that like in other omic approaches, there will be a confluence to standard procedures  
600 that are not currently common ground, making the current literature look intimidatingly  
601 diverse. Nevertheless, most of the basic processes described here are shared by the  
602 different experimental setups and data analysis pipes.

603

## 604 Abbreviations

605

606 **AI:** Artificial intelligence

607 **ANN:** Artificial neural networks

608 **CAI:** Cellulose Absorption Index

609 **CAR:** Chlorophyll absorption ratio

610 **CCD:** Charge coupled device

611 **Cig:** Coloration green

612 **Cir:** Coloration Index red

613 **CMOS:** Complementary metal oxide semiconductor

614 **CNN:** Convolutional neural networks

615 **CPU:** Central processing unit

616 **DL:** Deep learning

617 **DLAI:** Difference Leaf Area Index

618 **DSWI:** Disease water stress index

619 **DWT:** Daubechies wavelet transform

620 **EVI:** Enhanced vegetation index

621 **FAIR:** Findability, Accessibility, Interoperability, and Reusability

622 **GI:** Greenness Index

1  
2  
3  
4  
5  
6  
7  
8  
9  
10  
11  
12  
13  
14  
15  
16  
17  
18  
19  
20  
21  
22  
23  
24  
25  
26  
27  
28  
29  
30  
31  
32  
33  
34  
35  
36  
37  
38  
39  
40  
41  
42  
43  
44  
45  
46  
47  
48  
49  
50  
51  
52  
53  
54  
55  
56  
57  
58  
59  
60  
61  
62  
63  
64  
65

623 **GMM:** Gaussian mixture model  
624 **GNDVI:** Green normalized difference vegetation index  
625 **HOG:** Histograms of oriented gradients  
626 **KNN:** K nearest neighbour  
627 **LAI:** Leaf area index  
628 **LCA:** Lignin-Cellulose Absorption Index  
629 **LIDAR:** Light detection and ranging  
630 **LWVI-1:** Normalized Difference Leaf water VI 1  
631 **MCARI:** Modified Chlorophyll Absorption Ratio Index  
632 **MCFI:** Multicolour fluorescence imaging  
633 **ML:** Machine learning  
634 **NDVI:** Normalized Difference Vegetation index  
635 **NIR:** Near infrared  
636 **NLI:** Nonlinear vegetation index  
637 **NTDI:** Normalized Tillage Difference Index  
638 **OSAVI:** Optimized Soil Adjusted Vegetation Index  
639 **PCA:** Principal component analysis  
640 **PWI:** Plant Water Index  
641 **QTL:** Quantitative trait locus  
642 **RGB:** Red, green, blue  
643 **ROI:** Region of interest  
644 **SIFT:** Scale invariant features transforms  
645 **SURF:** Speeded-up robust features  
646 **SVM:** Support vector machine  
647 **TDI:** Time delay and integration  
648 **ToF:** Time of flight  
649  
650 [Competing interests](#)  
651  
652 The authors declare they have no competing interests  
653 [Funding](#)  
654  
655 This work was funded by grants FEDER BFU-2013-45148-R, Fundación Séneca  
656 19398/PI/14 to MEC and FEDER ViSelTR (TIN2012-39279) to PJN

657

658 Availability of supporting data and material

659

660 Not applicable

661 Authors contributions

662

663 FPS, MEC and PJN defined the scope of the manuscript, FPS, MEC and PJN wrote and  
664 corrected the manuscript, MEC and PJN wrote the grant applications.

665 Acknowledgments

666

667 We would like to thank Leanne Rebecca Miller for the edition of the manuscript and  
668 Victoria Ruiz-Hernández and Julia Weiss for comments on the manuscript.

669

670 Bibliography

671

672 1. Tucker C. Red and photographic infrared linear combinations for monitoring  
673 vegetation. Remote Sens. Environ. [Internet]. 1979 [cited 2016 Oct 11]; Available from:  
674 <http://www.sciencedirect.com/science/article/pii/0034425779900130>

675 2. Myneni RB, Keeling CD, Tucker CJ, Asrar G, Nemani RR. Increased plant growth in the  
676 northern high latitudes from 1981 to 1991. Nature. 1997;386:698–702.

677 3. DeFries R, Townshend J. NDVI-derived land cover classifications at a global scale. Int.  
678 J. Remote [Internet]. 1994 [cited 2016 Oct 11]; Available from:  
679 <http://www.tandfonline.com/doi/abs/10.1080/01431169408954345>

680 4. Pettorelli N, Vik J, Mysterud A, Gaillard J. Using the satellite-derived NDVI to assess  
681 ecological responses to environmental change. Trends Ecol. [Internet]. 2005 [cited  
682 2016 Oct 11]; Available from:  
683 <http://www.sciencedirect.com/science/article/pii/S016953470500162X>

684 5. Mkhabela MS, Bullock P, Raj S, Wang S, Yang Y. Crop yield forecasting on the  
685 Canadian Prairies using MODIS NDVI data. Agric. For. Meteorol. 2011;151:385–93.

686 6. GROTEN SME. NDVI—crop monitoring and early yield assessment of Burkina Faso.  
687 Int. J. Remote Sens. [Internet]. Taylor & Francis Group ; 1993 [cited 2016 Dec  
688 6];14:1495–515. Available from:

689 <http://www.tandfonline.com/doi/abs/10.1080/01431169308953983>

- 1  
2  
3  
4  
5  
6  
7  
8  
9  
10  
11  
12  
13  
14  
15  
16  
17  
18  
19  
20  
21  
22  
23  
24  
25  
26  
27  
28  
29  
30  
31  
32  
33  
34  
35  
36  
37  
38  
39  
40  
41  
42  
43  
44  
45  
46  
47  
48  
49  
50  
51  
52  
53  
54  
55  
56  
57  
58  
59  
60  
61  
62  
63  
64  
65
- 690 7. Jones HG, Stoll M, Santos T, de Sousa C, Chaves MM, Grant OM. Use of infrared  
691 thermography for monitoring stomatal closure in the field: application to grapevine. *J.*  
692 *Exp. Bot.* [Internet]. Oxford University Press; 2002 [cited 2016 Dec 6];53:2249–60.  
693 Available from: <http://www.ncbi.nlm.nih.gov/pubmed/12379792>
- 694 8. Chaerle L, Van der Straeten D. Seeing is believing: imaging techniques to monitor  
695 plant health. *Biochim. Biophys. Acta-Gene Struct. Expr.* 2001;1519:153–66.
- 696 9. Sirault XRR, James RA, Furbank RT, Bernstein L, Hayward H, Flowers T, et al. A new  
697 screening method for osmotic component of salinity tolerance in cereals using infrared  
698 thermography. *Funct. Plant Biol.* [Internet]. CSIRO PUBLISHING; 2009 [cited 2016 Dec  
699 6];36:970. Available from: <http://www.publish.csiro.au/?paper=FP09182>
- 700 10. Lobet G, Pagès L, Draye X. A Novel Image Analysis Toolbox Enabling Quantitative  
701 Analysis of Root System Architecture. *Plant Physiol.* [Internet]. 2011;157:29–39.  
702 Available from: <http://www.ncbi.nlm.nih.gov/pubmed/21771915>
- 703 11. Galkovskiy T, Mileyko Y, Bucksch A, Moore B, Symonova O, Price CA, et al. GiA  
704 Roots: software for the high throughput analysis of plant root system architecture.  
705 *BMC Plant Biol.* [Internet]. BioMed Central; 2012 [cited 2016 Sep 10];12:116. Available  
706 from: <http://bmcpantbiol.biomedcentral.com/articles/10.1186/1471-2229-12-116>
- 707 12. French A, Ubeda-Tomas S, Holman TJ, Bennett MJ, Pridmore T. High-Throughput  
708 Quantification of Root Growth Using a Novel Image-Analysis Tool. *Plant Physiol.*  
709 [Internet]. American Society of Plant Biologists; 2009 [cited 2016 Sep 20];150:1784–95.  
710 Available from:  
711 [http://www.pubmedcentral.nih.gov/articlerender.fcgi?artid=2719150&tool=pmcentre](http://www.pubmedcentral.nih.gov/articlerender.fcgi?artid=2719150&tool=pmcentrez&rendertype=abstract)  
712 [z&rendertype=abstract](http://www.pubmedcentral.nih.gov/articlerender.fcgi?artid=2719150&tool=pmcentrez&rendertype=abstract)
- 713 13. Golzarian MR, Frick RA, Rajendran K, Berger B, Roy S, Tester M, et al. Accurate  
714 inference of shoot biomass from high-throughput images of cereal plants. *Plant*  
715 *Methods* [Internet]. BioMed Central; 2011 [cited 2016 Sep 10];7:2. Available from:  
716 <http://plantmethods.biomedcentral.com/articles/10.1186/1746-4811-7-2>
- 717 14. Fabre J, Dauzat M, Negre V, Wuyts N, Tireau A, Gennari E, et al. PHENOPSIS DB: an  
718 Information System for Arabidopsis thaliana phenotypic data in an environmental  
719 context. *BMC Plant Biol.* 2011;11.
- 720 15. Araus JL, Cairns JE. Field high-throughput phenotyping: The new crop breeding  
721 frontier. *Trends Plant Sci.* 2014;19:52–61.

- 1  
2  
3  
4  
5  
6  
7  
8  
9  
10  
11  
12  
13  
14  
15  
16  
17  
18  
19  
20  
21  
22  
23  
24  
25  
26  
27  
28  
29  
30  
31  
32  
33  
34  
35  
36  
37  
38  
39  
40  
41  
42  
43  
44  
45  
46  
47  
48  
49  
50  
51  
52  
53  
54  
55  
56  
57  
58  
59  
60  
61  
62  
63  
64  
65
- 722 16. Furbank RT. Plant phenomics: from gene to form and function. *Funct. Plant Biol.*  
723 [Internet]. 2009 [cited 2016 Aug 31];36:V–Vi. Available from:  
724 [http://citeseerx.ist.psu.edu/viewdoc/download?doi=10.1.1.547.5673&rep=rep1&type](http://citeseerx.ist.psu.edu/viewdoc/download?doi=10.1.1.547.5673&rep=rep1&type=pdf)  
725 [=pdf](http://citeseerx.ist.psu.edu/viewdoc/download?doi=10.1.1.547.5673&rep=rep1&type=pdf)
- 726 17. Poorter H, Fiorani F, Pieruschka R, Putten WH Van Der, Kleyer M, Schurr U. Tansley  
727 review Pampered inside , pestered outside ? Differences and similarities between  
728 plants growing in controlled conditions and in the field. *New Phytol.* 2016;838–55.
- 729 18. Yang W, Duan L, Chen G, Xiong L, Liu Q. Plant phenomics and high-throughput  
730 phenotyping: Accelerating rice functional genomics using multidisciplinary  
731 technologies. *Curr. Opin. Plant Biol.* [Internet]. Elsevier Ltd; 2013;16:180–7. Available  
732 from: <http://dx.doi.org/10.1016/j.pbi.2013.03.005>
- 733 19. White J, Andrade-Sanchez P, Gore M. Field-based phenomics for plant genetics  
734 research. *F. Crop.* [Internet]. 2012 [cited 2016 Aug 31]; Available from:  
735 <http://www.sciencedirect.com/science/article/pii/S037842901200130X>
- 736 20. Fahlgren N, Gehan MA, Baxter I. Lights, camera, action: High-throughput plant  
737 phenotyping is ready for a close-up. *Curr. Opin. Plant Biol.* 2015. p. 93–9.
- 738 21. Furbank RT, Tester M. Phenomics - technologies to relieve the phenotyping  
739 bottleneck. *Trends Plant Sci.* 2011;16:635–44.
- 740 22. Granier C, Vile D. Phenotyping and beyond: Modelling the relationships between  
741 traits. *Curr. Opin. Plant Biol.* [Internet]. Elsevier Ltd; 2014;18:96–102. Available from:  
742 <http://dx.doi.org/10.1016/j.pbi.2014.02.009>
- 743 23. Xiong L, David L, Stevenson B, Zhu J-K. High Throughput Screening of Signal  
744 Transduction Mutants With Luciferase Imaging. *Plant Mol. Biol. Report.* Kluwer  
745 Academic Publishers; 1999;17:159–70.
- 746 24. Luehrsen KR, de Wet JR, Walbot V. [35] Transient expression analysis in plants  
747 using firefly luciferase reporter gene. 1992 [cited 2017 Apr 20]. p. 397–414. Available  
748 from: <http://linkinghub.elsevier.com/retrieve/pii/007668799216037K>
- 749 25. Millar AJ, Short SR, Chua NH, Kay SA. A Novel Circadian Phenotype Based on Firefly  
750 Luciferase Expression in Transgenic Plants. *Plant Cell.* 1992;4:1075–87.
- 751 26. Xiong L, David L, Stevenson B, Zhu J-K. High Throughput Screening of Signal  
752 Transduction Mutants With Luciferase Imaging. *Plant Mol. Biol. Report.* [Internet].  
753 Kluwer Academic Publishers; 1999 [cited 2016 Sep 10];17:159–70. Available from:

754 <http://link.springer.com/10.1023/A:1007519200505>  
1  
2 755 27. Millar AJ, Carré IA, Strayer CA, Chua NH, Kay SA. Circadian clock mutants in  
3  
4 756 *Arabidopsis* identified by luciferase imaging. *Science* [Internet]. 1995 [cited 2016 Sep  
5  
6 757 20];267:1161–3. Available from: <http://www.ncbi.nlm.nih.gov/pubmed/7855595>  
7  
8 758 28. Leister D, Varotto C, Pesaresi P, Niwergall A, Salamini F. Large-scale evaluation of  
9  
10 759 plant growth in *Arabidopsis thaliana* by non-invasive image analysis. *Plant Physiol.*  
11  
12 760 *Biochem.* 1999;37:671–8.  
13  
14 761 29. Matsuo T, Okamoto K, Onai K, Niwa Y, Shimogawara K, Ishiura M. A systematic  
15  
16 762 forward genetic analysis identified components of the *Chlamydomonas* circadian  
17  
18 763 system. *Genes Dev.* 2008;22:918–30.  
19  
20 764 30. Aoki S, Kato S, Ichikawa K, Shimizu M. Circadian expression of the PpLhcb2 gene  
21  
22 765 encoding a major light-harvesting chlorophyll a/b-binding protein in the moss  
23  
24 766 *Physcomitrella patens*. *Plant Cell Physiol.* 2004;45:68–76.  
25  
26 767 31. Kanno T, Lin WD, Fu JL, Wu MT, Yang HW, Lin SS, et al. Identification of coilin  
27  
28 768 mutants in a screen for enhanced expression of an alternatively spliced GFP reporter  
29  
30 769 gene in *Arabidopsis thaliana*. *Genetics.* 2016;203:1709–20.  
31  
32 770 32. Tóth R, Gerding-Reimers C, Deeks MJ, Menninger S, Gallegos RM, Tonaco IAN, et al.  
33  
34 771 Prieurianin/endosidin 1 is an actin-stabilizing small molecule identified from a chemical  
35  
36 772 genetic screen for circadian clock effectors in *Arabidopsis thaliana*. *Plant J.*  
37  
38 773 2012;71:338–52.  
39  
40 774 33. White J, Andrade-Sanchez P, Gore M. Field-based phenomics for plant genetics  
41  
42 775 research. *F. Crop.* 2012;  
43  
44 776 34. Furbank RT, Tester M. Phenomics - technologies to relieve the phenotyping  
45  
46 777 bottleneck. *Trends Plant Sci.* 2011;16:635–44.  
47  
48 778 35. Simko I, Jimenez-Berni JA, Sirault XRR. Phenomic approaches and tools for  
49  
50 779 phytopathologists. *Phytopathology* [Internet]. 2016;PHYTO-02-16-0082-RVW. Available  
51  
52 780 from: <http://apsjournals.apsnet.org/doi/10.1094/PHYTO-02-16-0082-RVW>  
53  
54 781 36. da Silva Marques J. Monitoring Photosynthesis by In Vivo Chlorophyll  
55  
56 782 Fluorescence : Application to High-Throughput Plant Phenotyping. *Appl. Photosynth. -*  
57  
58 783 *New Prog.* 2016;Intech:3–22.  
59  
60 784 37. Gonzalez RC, Woods RE. *Digital image processing.* Prentice Hall Press ; 2002.  
61  
62 785 38. Russ J, Woods R. *The image processing handbook.* 1995 [cited 2017 Apr 25];  
63  
64  
65

786 Available from:  
787 [http://journals.lww.com/jcat/Citation/1995/11000/The\\_Image\\_Processing\\_Handbook,](http://journals.lww.com/jcat/Citation/1995/11000/The_Image_Processing_Handbook,_)  
788 [\\_2nd\\_Ed.26.aspx](http://journals.lww.com/jcat/Citation/1995/11000/The_Image_Processing_Handbook,_2nd_Ed.26.aspx)  
789 39. Jain A. Fundamentals of digital image processing. 1989 [cited 2017 Apr 25];  
790 Available from: <http://dl.acm.org/citation.cfm?id=59921>  
791 40. Sonka M, Hlavac V, Boyle R. Image processing, analysis, and machine vision  
792 [Internet]. 4th ed. CL Engineering; 2014 [cited 2017 Apr 24]. Available from:  
793 <https://books.google.es/books?hl=en&lr=&id=QePKAgAAQBAJ&oi=fnd&pg=PR11&dq=>  
794 [image+analysis+a+review&ots=95qB21F9B-&sig=kSGTMS9GfxkddVJUHNxnBzU2VL8](https://books.google.es/books?hl=en&lr=&id=QePKAgAAQBAJ&oi=fnd&pg=PR11&dq=image+analysis+a+review&ots=95qB21F9B-&sig=kSGTMS9GfxkddVJUHNxnBzU2VL8)  
795 41. Soille P. Morphological image analysis: principles and applications [Internet].  
796 Springer; 2013 [cited 2017 Apr 24]. Available from:  
797 <https://books.google.es/books?hl=en&lr=&id=ZFzxCAAQBAJ&oi=fnd&pg=PA1&dq=i>  
798 [mage+analysis+a+review&ots=-oc-0SEZ6g&sig=wLoRbdNSusr-5UtgD\\_RvtMHVqjQ](https://books.google.es/books?hl=en&lr=&id=ZFzxCAAQBAJ&oi=fnd&pg=PA1&dq=image+analysis+a+review&ots=-oc-0SEZ6g&sig=wLoRbdNSusr-5UtgD_RvtMHVqjQ)  
799 42. Li L, Zhang Q, Huang D. A Review of Imaging Techniques for Plant Phenotyping.  
800 Sensors. 2014;14:20078–111.  
801 43. Singh A, Ganapathysubramanian B, Singh AK, Sarkar S. Machine Learning for High-  
802 Throughput Stress Phenotyping in Plants. Trends Plant Sci. 2016. p. 110–24.  
803 44. Fiorani F, Schurr U. Future scenarios for plant phenotyping. Annu. Rev. Plant Biol.  
804 [Internet]. 2013 [cited 2016 Sep 21];64:267–91. Available from:  
805 <http://www.ncbi.nlm.nih.gov/pubmed/23451789>  
806 45. Lepage G, Bogaerts J, Meynants G. Time-Delay-Integration Architectures in CMOS  
807 Image Sensors. IEEE Trans. Electron Devices [Internet]. 2009 [cited 2017 Apr 26];56.  
808 Available from:  
809 [http://s3.amazonaws.com/academia.edu.documents/34420865/05272462.pdf?AWSA](http://s3.amazonaws.com/academia.edu.documents/34420865/05272462.pdf?AWSAccessKeyId=AKIAIWOWYYGZ2Y53UL3A&Expires=1493227777&Signature=%2BCCwsvCd)  
810 [ccessKeyId=AKIAIWOWYYGZ2Y53UL3A&Expires=1493227777&Signature=%2BCCwsvCd](http://s3.amazonaws.com/academia.edu.documents/34420865/05272462.pdf?AWSAccessKeyId=AKIAIWOWYYGZ2Y53UL3A&Expires=1493227777&Signature=%2BCCwsvCd)  
811 [YXhWhL83LxFrED1f9pY%3D&response-content-disposition=inline%3B](http://s3.amazonaws.com/academia.edu.documents/34420865/05272462.pdf?AWSAccessKeyId=AKIAIWOWYYGZ2Y53UL3A&Expires=1493227777&Signature=%2BCCwsvCd)  
812 [filename%3D05272462.pdf](http://s3.amazonaws.com/academia.edu.documents/34420865/05272462.pdf?AWSAccessKeyId=AKIAIWOWYYGZ2Y53UL3A&Expires=1493227777&Signature=%2BCCwsvCd)  
813 46. Yu C, Nie K, Xu J, Gao J. A Low Power Digital Accumulation Technique for Digital-  
814 Domain CMOS TDI Image Sensor. Sensors [Internet]. Multidisciplinary Digital  
815 Publishing Institute; 2016 [cited 2017 Apr 24];16:1572. Available from:  
816 <http://www.mdpi.com/1424-8220/16/10/1572>  
817 47. Teledyne Dalsa. No Title. <https://www.teledynedalsa.com/corp/>.



- 1  
2  
3  
4  
5  
6  
7  
8  
9  
10  
11  
12  
13  
14  
15  
16  
17  
18  
19  
20  
21  
22  
23  
24  
25  
26  
27  
28  
29  
30  
31  
32  
33  
34  
35  
36  
37  
38  
39  
40  
41  
42  
43  
44  
45  
46  
47  
48  
49  
50  
51  
52  
53  
54  
55  
56  
57  
58  
59  
60  
61  
62  
63  
64  
65
- 818 48. IMEC. I Mec launches TDI, multispectral and hyperspectral sensors [Internet]. [cited  
819 2017 Apr 24]. Available from: <http://optics.org/news/8/2/8>
- 820 49. Van Der Heijden G, Song Y, Horgan G, Polder G, Dieleman A, Bink M, et al. SPICY:  
821 Towards automated phenotyping of large pepper plants in the greenhouse. *Funct.*  
822 *Plant Biol.* CSIRO PUBLISHING; 2012;39:870–7.
- 823 50. Navarro PJ, Fernández C, Weiss J, Egea-Cortines M. Development of a configurable  
824 growth chamber with a computer vision system to study circadian rhythm in plants.  
825 *Sensors* (Basel). [Internet]. 2012 [cited 2016 Sep 20];12:15356–75. Available from:  
826 <http://www.ncbi.nlm.nih.gov/pubmed/23202214>
- 827 51. Subramanian R, Spalding EP, Ferrier NJ. A high throughput robot system for  
828 machine vision based plant phenotype studies. *Mach. Vis. Appl.* [Internet].  
829 2013;24:619–36. Available from: <http://link.springer.com/10.1007/s00138-012-0434-4>
- 830 52. Zhang X, Huang C, Wu D, Qiao F, Li W, Duan L, et al. High-throughput phenotyping  
831 and QTL mapping reveals the genetic architecture of maize plant growth. *Plant Physiol.*  
832 [Internet]. 2017;pp.01516.2016. Available from:  
833 <http://www.plantphysiol.org/lookup/doi/10.1104/pp.16.01516>
- 834 53. Virlet N, Sabermanesh K, Sadeghi-Tehran P, Hawkesford MJ. Field Scanalyzer: An  
835 automated robotic field phenotyping platform for detailed crop monitoring. *Funct.*  
836 *Plant Biol.* [Internet]. 2017 [cited 2017 May 11];44:143. Available from:  
837 <http://www.publish.csiro.au/?paper=FP16163>
- 838 54. Deery D, Jimenez-Berni J, Jones H, Sirault X, Furbank R. Proximal Remote Sensing  
839 Buggies and Potential Applications for Field-Based Phenotyping. *Agronomy* [Internet].  
840 Multidisciplinary Digital Publishing Institute; 2014 [cited 2017 May 23];4:349–79.  
841 Available from: <http://www.mdpi.com/2073-4395/4/3/349/>
- 842 55. Comar A, Burger P, de Solan B, Baret F, Daumard F, Hanocq J-F, et al. A semi-  
843 automatic system for high throughput phenotyping wheat cultivars in-field conditions:  
844 description and first results. *Funct. Plant Biol.* CSIRO PUBLISHING; 2012;39:914.
- 845 56. Brown MZ, Burschka D, Hager GD. Advances in computational stereo. *IEEE Trans.*  
846 *Pattern Anal. Mach. Intell.* [Internet]. 2003 [cited 2017 Apr 26];25:993–1008. Available  
847 from: <http://ieeexplore.ieee.org/document/1217603/>
- 848 57. Biskup B, Scharr H, Schurr U, Rascher U. A stereo imaging system for measuring  
849 structural parameters of plant canopies. *Plant, Cell Environ.* [Internet]. Blackwell

1  
2  
3  
4  
5  
6  
7  
8  
9  
10  
11  
12  
13  
14  
15  
16  
17  
18  
19  
20  
21  
22  
23  
24  
25  
26  
27  
28  
29  
30  
31  
32  
33  
34  
35  
36  
37  
38  
39  
40  
41  
42  
43  
44  
45  
46  
47  
48  
49  
50  
51  
52  
53  
54  
55  
56  
57  
58  
59  
60  
61  
62  
63  
64  
65

850 Publishing Ltd; 2007 [cited 2016 Sep 20];30:1299–308. Available from:  
851 <http://doi.wiley.com/10.1111/j.1365-3040.2007.01702.x>  
852 58. Nguyen TT, Slaughter DC, Max N, Maloof JN, Sinha N. Structured light-based 3D  
853 reconstruction system for plants. *Sensors (Switzerland)* [Internet]. Multidisciplinary  
854 Digital Publishing Institute; 2015 [cited 2016 Sep 21];15:18587–612. Available from:  
855 <http://www.mdpi.com/1424-8220/15/8/18587/>  
856 59. Klodt M, Herzog K, Töpfer R, Cremers D, Töpfer R, Hausmann L, et al. Field  
857 phenotyping of grapevine growth using dense stereo reconstruction. *BMC*  
858 *Bioinformatics* [Internet]. BioMed Central; 2015 [cited 2016 Oct 7];16:143. Available  
859 from: <http://www.biomedcentral.com/1471-2105/16/143>  
860 60. Rose J, Kicherer A, Wieland M, Klingbeil L, Töpfer R, Kuhlmann H. Towards  
861 Automated Large-Scale 3D Phenotyping of Vineyards under Field Conditions. *Sensors*  
862 [Internet]. Multidisciplinary Digital Publishing Institute; 2016 [cited 2017 May  
863 11];16:2136. Available from: <http://www.mdpi.com/1424-8220/16/12/2136>  
864 61. Xiong X, Yu L, Yang W, Liu M, Jiang N, Wu D, et al. A high-throughput stereo-  
865 imaging system for quantifying rape leaf traits during the seedling stage. *Plant*  
866 *Methods* [Internet]. BioMed Central; 2017 [cited 2017 Feb 8];13:7. Available from:  
867 <http://plantmethods.biomedcentral.com/articles/10.1186/s13007-017-0157-7>  
868 62. Paproki A, Sirault XRR, Berry S, Furbank RT, Fripp J. A novel mesh processing based  
869 technique for 3D plant analysis. *BMC Plant Biol.* [Internet]. 2012;12:63. Available from:  
870 <http://www.biomedcentral.com/1471-2229/12/63>  
871 63. Nguyen TT, Slaughter DC, Maloof JN, Sinha N. Plant phenotyping using multi-view  
872 stereo vision with structured lights. In: Valasek J, Thomasson JA, editors. *International*  
873 *Society for Optics and Photonics*; 2016 [cited 2017 May 19]. p. 986608. Available from:  
874 <http://proceedings.spiedigitallibrary.org/proceeding.aspx?doi=10.1117/12.2229513>  
875 64. Rose JC, Paulus S, Kuhlmann H. Accuracy analysis of a multi-view stereo approach  
876 for phenotyping of tomato plants at the organ level. *Sensors (Basel)*. [Internet].  
877 Multidisciplinary Digital Publishing Institute (MDPI); 2015 [cited 2017 May  
878 19];15:9651–65. Available from: <http://www.ncbi.nlm.nih.gov/pubmed/25919368>  
879 65. Schwartz S. An overview of 3D plant phenotyping methods [Internet]. *Phenospex.*  
880 *Smart Plant Analysis*. 2015 [cited 2017 Jun 19]. Available from:  
881 <https://phenospex.com/blog/an-overview-of-3d-plant-phenotyping-methods/#ref>

1  
2  
3  
4  
5  
6  
7  
8  
9  
10  
11  
12  
13  
14  
15  
16  
17  
18  
19  
20  
21  
22  
23  
24  
25  
26  
27  
28  
29  
30  
31  
32  
33  
34  
35  
36  
37  
38  
39  
40  
41  
42  
43  
44  
45  
46  
47  
48  
49  
50  
51  
52  
53  
54  
55  
56  
57  
58  
59  
60  
61  
62  
63  
64  
65

882 66. Lee K-S, Cohen WB, Kennedy RE, Maiersperger TK, Gower ST. Hyperspectral versus  
883 multispectral data for estimating leaf area index in four different biomes. Remote  
884 Sens. Environ. [Internet]. 2004 [cited 2017 Apr 27];91:508–20. Available from:  
885 <http://www.sciencedirect.com/science/article/pii/S0034425704001282>  
886 67. Dozier J, Painter TH. MULTISPECTRAL AND HYPERSPECTRAL REMOTE SENSING OF  
887 ALPINE SNOW PROPERTIES. Annu. Rev. Earth Planet. Sci. [Internet]. Annual Reviews;  
888 2004 [cited 2017 Apr 27];32:465–94. Available from:  
889 <http://www.annualreviews.org/doi/10.1146/annurev.earth.32.101802.120404>  
890 68. Adam E, Mutanga O, Rugege D. Multispectral and hyperspectral remote sensing for  
891 identification and mapping of wetland vegetation: a review. Wetl. Ecol. Manag.  
892 [Internet]. Springer Netherlands; 2010 [cited 2017 Apr 27];18:281–96. Available from:  
893 <http://link.springer.com/10.1007/s11273-009-9169-z>  
894 69. Qin J, Chao K, Kim MS, Lu R, Burks TF. Hyperspectral and multispectral imaging for  
895 evaluating food safety and quality. J. Food Eng. [Internet]. 2013 [cited 2017 Apr  
896 27];118:157–71. Available from:  
897 <http://www.sciencedirect.com/science/article/pii/S0260877413001659>  
898 70. van der Meer FD, van der Werff HMA, van Ruitenbeek FJA, Hecker CA, Bakker WH,  
899 Noomen MF, et al. Multi- and hyperspectral geologic remote sensing: A review. Int. J.  
900 Appl. Earth Obs. Geoinf. [Internet]. 2012 [cited 2017 Apr 27];14:112–28. Available  
901 from: <http://www.sciencedirect.com/science/article/pii/S0303243411001103>  
902 71. P. M. Mehl PM, K. Chao K, M. Kim M, Y. R. Chen YR. DETECTION OF DEFECTS ON  
903 SELECTED APPLE CULTIVARS USING HYPERSPECTRAL AND MULTISPECTRAL IMAGE  
904 ANALYSIS. Appl. Eng. Agric. [Internet]. American Society of Agricultural and Biological  
905 Engineers; 2002 [cited 2017 Apr 27];18:219. Available from:  
906 [http://elibrary.asabe.org/abstract.asp??JID=3&AID=7790&CID=aeaj2002&v=18&i=2&T](http://elibrary.asabe.org/abstract.asp??JID=3&AID=7790&CID=aeaj2002&v=18&i=2&T=1)  
907 =1  
908 72. Ferrato L-J. COMPARING HYPERSPECTRAL AND MULTISPECTRAL IMAGERY FOR  
909 LAND CLASSIFICATION OF THE LOWER DON RIVER, TORONTO. [cited 2017 Apr 27];  
910 Available from:  
911 <http://www.geography.ryerson.ca/wayne/MSA/LisaJenFerratoMRP2012.pdf>  
912 73. S 137 - ButterflyEYE NIR - Cubert-GmbH [Internet]. [cited 2017 Jun 4]. Available  
913 from: <http://cubert-gmbh.com/product/s-137-butterfleye-nir/>

1  
2  
3  
4  
5  
6  
7  
8  
9  
10  
11  
12  
13  
14  
15  
16  
17  
18  
19  
20  
21  
22  
23  
24  
25  
26  
27  
28  
29  
30  
31  
32  
33  
34  
35  
36  
37  
38  
39  
40  
41  
42  
43  
44  
45  
46  
47  
48  
49  
50  
51  
52  
53  
54  
55  
56  
57  
58  
59  
60  
61  
62  
63  
64  
65

914 74. Kise M, Park B, Heitschmidt GW, Lawrence KC, Windham WR. Multispectral  
915 imaging system with interchangeable filter design. *Comput. Electron. Agric.*  
916 2010;72:61–8.

917 75. Li P, Lee S-H, Hsu H-Y, Park J-S. Nonlinear Fusion of Multispectral Citrus Fruit Image  
918 Data with Information Contents. *Sensors* [Internet]. Multidisciplinary Digital Publishing  
919 Institute; 2017 [cited 2017 Jan 23];17:142. Available from:  
920 <http://www.mdpi.com/1424-8220/17/1/142>

921 76. Wahabzada M, Mahlein A-K, Bauckhage C, Steiner U, Oerke E-C, Kersting K. Plant  
922 Phenotyping using Probabilistic Topic Models: Uncovering the Hyperspectral Language  
923 of Plants. *Sci. Rep.* [Internet]. Nature Publishing Group; 2016 [cited 2017 Jan  
924 24];6:22482. Available from: <http://www.ncbi.nlm.nih.gov/pubmed/26957018>

925 77. Kuska M, Wahabzada M, Leucker M, Dehne H-W, Kersting K, Oerke E-C, et al.  
926 Hyperspectral phenotyping on the microscopic scale: towards automated  
927 characterization of plant-pathogen interactions. *Plant Methods* [Internet]. 2015 [cited  
928 2017 May 11];11:28. Available from: <http://www.plantmethods.com/content/11/1/28>

929 78. Klose R, Penlington J. Usability study of 3D time-of-flight cameras for automatic  
930 plant phenotyping. *Bornimer* [Internet]. 2009 [cited 2017 May 2]; Available from:  
931 [https://www.hs-](https://www.hs-osnabrueck.de/fileadmin/HSOS/Homepages/COALA/Veroeffentlichungen/2009-CBA-3DToF.pdf)  
932 [osnabrueck.de/fileadmin/HSOS/Homepages/COALA/Veroeffentlichungen/2009-CBA-](https://www.hs-osnabrueck.de/fileadmin/HSOS/Homepages/COALA/Veroeffentlichungen/2009-CBA-3DToF.pdf)  
933 [3DToF.pdf](https://www.hs-osnabrueck.de/fileadmin/HSOS/Homepages/COALA/Veroeffentlichungen/2009-CBA-3DToF.pdf)

934 79. Song Y, Glasbey CA, van der Heijden GWAM, Polder G, Dieleman JA. Combining  
935 Stereo and Time-of-Flight Images with Application to Automatic Plant Phenotyping.  
936 Springer Berlin Heidelberg; 2011. p. 467–78.

937 80. Alenyà G, Dellen B, Torras C. 3D modelling of leaves from color and ToF data for  
938 robotized plant measuring. *Robot. Autom. (ICRA)*, [Internet]. 2011 [cited 2017 May 2];  
939 Available from: <http://ieeexplore.ieee.org/abstract/document/5980092/>

940 81. McCormick RF, Truong SK, Mullet JE. 3D Sorghum Reconstructions from Depth  
941 Images Identify QTL Regulating Shoot Architecture. *Plant Physiol.* [Internet]. American  
942 Society of Plant Biologists; 2016 [cited 2017 May 2];172:823–34. Available from:  
943 <http://www.ncbi.nlm.nih.gov/pubmed/27528244>

944 82. Paulus S, Behmann J, Mahlein A, Plümer L. Low-cost 3D systems: suitable tools for  
945 plant phenotyping. *Sensors* [Internet]. 2014 [cited 2017 May 2]; Available from:

946 <http://www.mdpi.com/1424-8220/14/2/3001/htm>

947 83. Microsoft. Kinect for Windows Sensor Components and Specifications [Internet].  
948 2010. [cited 2017 May 7]. Available from: [https://msdn.microsoft.com/en-](https://msdn.microsoft.com/en-us/library/jj131033.aspx)  
949 [us/library/jj131033.aspx](https://msdn.microsoft.com/en-us/library/jj131033.aspx)

950 84. Azzari G, Goulden M, Rusu R. Rapid Characterization of Vegetation Structure with a  
951 Microsoft Kinect Sensor. *Sensors* [Internet]. Multidisciplinary Digital Publishing  
952 Institute; 2013 [cited 2017 May 7];13:2384–98. Available from:  
953 <http://www.mdpi.com/1424-8220/13/2/2384/>

954 85. Chéné Y, Rousseau D, Lucidarme P, Bertheloot J, Caffier V, Morel P, et al. On the  
955 use of depth camera for 3D phenotyping of entire plants. *Comput. Electron. Agric.*  
956 2012;82:122–7.

957 86. Wang G, Weng Q. Remote sensing of natural resources. [cited 2017 May 9]. p. 532.  
958 Available from:  
959 [https://books.google.es/books?id=wIDNBQAAQBAJ&pg=PA9&dq=Light+Detection+an](https://books.google.es/books?id=wIDNBQAAQBAJ&pg=PA9&dq=Light+Detection+and+Ranging+(LIDAR)+1970s&hl=es&sa=X&ved=0ahUKEwi0mbSksePTAhVJDxoKHaKxC6UQ6AEIjAA#v=onepage&q=Light+Detection+and+Ranging+(LIDAR)+1970s&f=false)  
960 [d+Ranging+\(LIDAR\)+1970s&hl=es&sa=X&ved=0ahUKEwi0mbSksePTAhVJDxoKHaKxC6U](https://books.google.es/books?id=wIDNBQAAQBAJ&pg=PA9&dq=Light+Detection+and+Ranging+(LIDAR)+1970s&hl=es&sa=X&ved=0ahUKEwi0mbSksePTAhVJDxoKHaKxC6UQ6AEIjAA#v=onepage&q=Light+Detection+and+Ranging+(LIDAR)+1970s&f=false)  
961 [Q6AEIjAA#v=onepage&q=Light Detection and Ranging \(LIDAR\) 1970s&f=false](https://books.google.es/books?id=wIDNBQAAQBAJ&pg=PA9&dq=Light+Detection+and+Ranging+(LIDAR)+1970s&hl=es&sa=X&ved=0ahUKEwi0mbSksePTAhVJDxoKHaKxC6UQ6AEIjAA#v=onepage&q=Light+Detection+and+Ranging+(LIDAR)+1970s&f=false)

962 87. Lin Y. LiDAR: An important tool for next-generation phenotyping technology of high  
963 potential for plant phenomics? *Comput. Electron. Agric.* Elsevier B.V.; 2015;119:61–73.

964 88. Vázquez-Arellano M, Griepentrog HW, Reiser D, Paraforos DS. 3-D Imaging Systems  
965 for Agricultural Applications-A Review. *Sensors* (Basel). [Internet]. Multidisciplinary  
966 Digital Publishing Institute (MDPI); 2016 [cited 2017 May 2];16. Available from:  
967 <http://www.ncbi.nlm.nih.gov/pubmed/27136560>

968 89. Chen JM, Cihlar J. Retrieving leaf area index of boreal conifer forests using Landsat  
969 TM images. *Remote Sens. Environ.* [Internet]. 1996 [cited 2016 Sep 26];55:155–62.  
970 Available from: <http://linkinghub.elsevier.com/retrieve/pii/0034425795001956>

971 90. Gwenzi D, Helmer E, Zhu X, Lefsky M, Marcano-Vega H. Predictions of Tropical  
972 Forest Biomass and Biomass Growth Based on Stand Height or Canopy Area Are  
973 Improved by Landsat-Scale Phenology across Puerto Rico and the U.S. Virgin Islands.  
974 *Remote Sens.* [Internet]. Multidisciplinary Digital Publishing Institute; 2017 [cited 2017  
975 May 9];9:123. Available from: <http://www.mdpi.com/2072-4292/9/2/123>

976 91. Kelldorfer JM, Walker WS, LaPoint E, Kirsch K, Bishop J, Fiske G. Statistical fusion  
977 of lidar, InSAR, and optical remote sensing data for forest stand height

1  
2  
3  
4  
5  
6  
7  
8  
9  
10  
11  
12  
13  
14  
15  
16  
17  
18  
19  
20  
21  
22  
23  
24  
25  
26  
27  
28  
29  
30  
31  
32  
33  
34  
35  
36  
37  
38  
39  
40  
41  
42  
43  
44  
45  
46  
47  
48  
49  
50  
51  
52  
53  
54  
55  
56  
57  
58  
59  
60  
61  
62  
63  
64  
65

978 characterization: A regional-scale method based on LVIS, SRTM, Landsat ETM+, and  
979 ancillary data sets. *J. Geophys. Res. Biogeosciences* [Internet]. 2010 [cited 2017 May  
980 9];115:n/a-n/a. Available from: <http://doi.wiley.com/10.1029/2009JG000997>  
981 92. Badreldin N, Sanchez-Azofeifa A. Estimating Forest Biomass Dynamics by  
982 Integrating Multi-Temporal Landsat Satellite Images with Ground and Airborne LiDAR  
983 Data in the Coal Valley Mine, Alberta, Canada. *Remote Sens.* [Internet].  
984 Multidisciplinary Digital Publishing Institute; 2015 [cited 2017 May 9];7:2832–49.  
985 Available from: <http://www.mdpi.com/2072-4292/7/3/2832/>  
986 93. Andújar D, Rueda-Ayala V, Moreno H, Rosell-Polo JR, Escolà A, Valero C, et al.  
987 Discriminating crop, weeds and soil surface with a terrestrial LIDAR sensor. *Sensors*  
988 (Switzerland) [Internet]. Multidisciplinary Digital Publishing Institute; 2013 [cited 2017  
989 May 8];13:14662–75. Available from: <http://www.mdpi.com/1424-8220/13/11/14662/>  
990 94. Sun S, Li C, Paterson A. In-Field High-Throughput Phenotyping of Cotton Plant  
991 Height Using LiDAR. *Remote Sens.* [Internet]. Multidisciplinary Digital Publishing  
992 Institute; 2017 [cited 2017 May 8];9:377. Available from: <http://www.mdpi.com/2072-4292/9/4/377>  
993 95. Hosoi F, Nakabayashi K, Omasa K. 3-D modeling of tomato canopies using a high-  
994 resolution portable scanning lidar for extracting structural information. *Sensors*  
995 (Basel). [Internet]. Multidisciplinary Digital Publishing Institute (MDPI); 2011 [cited  
996 2017 May 7];11:2166–74. Available from:  
997 <http://www.ncbi.nlm.nih.gov/pubmed/22319403>  
998 96. Chaudhury A, Ward C, Talasaz A, Ivanov AG, Norman PAH, Grodzinski B, et al.  
1000 Computer Vision Based Autonomous Robotic System for 3D Plant Growth  
1001 Measurement. *12th Conf. Comput. Robot Vis.* 2015;290–6.  
1002 97. Kjaer KH, Ottosen C-O. 3D Laser Triangulation for Plant Phenotyping in Challenging  
1003 Environments. *Sensors (Basel)*. [Internet]. Multidisciplinary Digital Publishing Institute  
1004 (MDPI); 2015 [cited 2017 Jan 18];15:13533–47. Available from:  
1005 <http://www.ncbi.nlm.nih.gov/pubmed/26066990>  
1006 98. Lin Y. LiDAR: An important tool for next-generation phenotyping technology of high  
1007 potential for plant phenomics? *Comput. Electron. Agric.* [Internet]. 2015 [cited 2017  
1008 May 8];119:61–73. Available from:  
1009 <http://www.sciencedirect.com/science/article/pii/S0168169915003245>

- 1010 99. Wallace A, Nichol C, Woodhouse I. Recovery of Forest Canopy Parameters by  
1011 Inversion of Multispectral LiDAR Data. *Remote Sens.* [Internet]. Molecular Diversity  
1012 Preservation International; 2012 [cited 2017 May 19];4:509–31. Available from:  
1013 <http://www.mdpi.com/2072-4292/4/2/509/>  
1014 100. Morsy S, Shaker A, El-Rabbany A. Multispectral LiDAR Data for Land Cover  
1015 Classification of Urban Areas. *Sensors* [Internet]. 2017 [cited 2017 May 19];17:958.  
1016 Available from: <http://www.ncbi.nlm.nih.gov/pubmed/28445432>  
1017 101. Wallace AM, McCarthy A, Nichol CJ, Ximing Ren, Morak S, Martinez-Ramirez D, et  
1018 al. Design and Evaluation of Multispectral LiDAR for the Recovery of Arboreal  
1019 Parameters. *IEEE Trans. Geosci. Remote Sens.* [Internet]. 2014 [cited 2017 May  
1020 19];52:4942–54. Available from: <http://ieeexplore.ieee.org/document/6672004/>  
1021 102. Navarro P, Fernández C, Borraz R, Alonso D. A Machine Learning Approach to  
1022 Pedestrian Detection for Autonomous Vehicles Using High-Definition 3D Range Data.  
1023 *Sensors*. Multidisciplinary Digital Publishing Institute; 2016;17:18.  
1024 103. Padhi J, Misra RK, Payero JO. Estimation of soil water deficit in an irrigated cotton  
1025 field with infrared thermography. *F. Crop. Res.* [Internet]. 2012 [cited 2017 May  
1026 12];126:45–55. Available from:  
1027 <http://linkinghub.elsevier.com/retrieve/pii/S0378429011003303>  
1028 104. Guilioni L, Jones HG, Leinonen I, Lhomme JP. On the relationships between  
1029 stomatal resistance and leaf temperatures in thermography. *Agric. For. Meteorol.*  
1030 [Internet]. 2008 [cited 2017 May 12];148:1908–12. Available from:  
1031 <http://linkinghub.elsevier.com/retrieve/pii/S0168192308002074>  
1032 105. Kranner I, Kastberger G, Hartbauer M, Pritchard HW. Noninvasive diagnosis of  
1033 seed viability using infrared thermography. *Proc. Natl. Acad. Sci.* [Internet]. 2010 [cited  
1034 2017 May 12];107:3912–7. Available from:  
1035 <http://www.pnas.org/cgi/doi/10.1073/pnas.0914197107>  
1036 106. Jones HG. Use of infrared thermography for monitoring stomatal closure in the  
1037 field: application to grapevine. *J. Exp. Bot.* [Internet]. 2002 [cited 2017 May  
1038 12];53:2249–60. Available from: [https://academic.oup.com/jxb/article-](https://academic.oup.com/jxb/article-lookup/doi/10.1093/jxb/erf083)  
1039 [lookup/doi/10.1093/jxb/erf083](https://academic.oup.com/jxb/article-lookup/doi/10.1093/jxb/erf083)  
1040 107. Fiorani F, Rascher U, Jahnke S, Schurr U. Imaging plants dynamics in heterogenic  
1041 environments. *Curr. Opin. Biotechnol.* [Internet]. 2012 [cited 2017 May 12];23:227–35.

1042 Available from:

1043 <http://www.sciencedirect.com/science/article/pii/S0958166911007531>

1044 108. Mallona I, Egea-Cortines M, Weiss J. Conserved and divergent rhythms of CAM-

1045 related and core clock gene expression in the cactus *Opuntia ficus-indica*. *Plant Physiol.*

1046 2011;156:1978–89.

1047 109. Somers DE, Webb a a, Pearson M, Kay S a. The short-period mutant, *toc1-1*,

1048 alters circadian clock regulation of multiple outputs throughout development in

1049 *Arabidopsis thaliana*. *Development* [Internet]. 1998;125:485–94. Available from:

1050 <http://www.ncbi.nlm.nih.gov/pubmed/9425143>

1051 110. Costa JM, Grant OM, Chaves MM, I D, M F, RD J, et al. Thermography to explore

1052 plant-environment interactions. *J. Exp. Bot.* [Internet]. Oxford University Press; 2013

1053 [cited 2017 Jan 24];64:3937–49. Available from: [https://academic.oup.com/jxb/article-](https://academic.oup.com/jxb/article-lookup/doi/10.1093/jxb/ert029)

1054 [lookup/doi/10.1093/jxb/ert029](https://academic.oup.com/jxb/article-lookup/doi/10.1093/jxb/ert029)

1055 111. Zia S, Romano G, Spreer W, Sanchez C, Cairns J, Araus JL, et al. Infrared Thermal

1056 Imaging as a Rapid Tool for Identifying Water-Stress Tolerant Maize Genotypes of

1057 Different Phenology. *J. Agron. Crop Sci.* [Internet]. 2013 [cited 2017 May 12];199:75–

1058 84. Available from: <http://doi.wiley.com/10.1111/j.1439-037X.2012.00537.x>

1059 112. Jones HG, Serraj R, Loveys BR, Xiong L, Wheaton A, Price AH. Thermal infrared

1060 imaging of crop canopies for the remote diagnosis and quantification of plant

1061 responses to water stress in the field. *Funct. Plant Biol.* [Internet]. CSIRO PUBLISHING;

1062 2009 [cited 2017 May 12];36:978. Available from:

1063 <http://www.publish.csiro.au/?paper=FP09123>

1064 113. Jones HG, Stoll M, Santos T, de Sousa C, Chaves MM, Grant OM. Use of infrared

1065 thermography for monitoring stomatal closure in the field: application to grapevine. *J.*

1066 *Exp. Bot.* Oxford University Press; 2002;53:2249–60.

1067 114. Prashar A, Jones H. Infra-Red Thermography as a High-Throughput Tool for Field

1068 Phenotyping. *Agronomy* [Internet]. Multidisciplinary Digital Publishing Institute; 2014

1069 [cited 2017 May 21];4:397–417. Available from: [http://www.mdpi.com/2073-](http://www.mdpi.com/2073-4395/4/3/397/)

1070 [4395/4/3/397/](http://www.mdpi.com/2073-4395/4/3/397/)

1071 115. Mahlein A-K. Plant Disease Detection by Imaging Sensors – Parallels and Specific

1072 Demands for Precision Agriculture and Plant Phenotyping. *Plant Dis.* [Internet]. *Plant*

1073 *Disease*; 2016 [cited 2017 Jan 18];100:241–51. Available from:



1074 <http://apsjournals.apsnet.org/doi/10.1094/PDIS-03-15-0340-FE>

1075 116. Oerke E-C, Fröhling P, Steiner U. Thermographic assessment of scab disease on  
1076 apple leaves. *Precis. Agric.* [Internet]. Springer US; 2011 [cited 2017 May 21];12:699–  
1077 715. Available from: <http://link.springer.com/10.1007/s11119-010-9212-3>

1078 117. Chapple CC, Vogt T, Ellis BE, Somerville CR. An Arabidopsis mutant defective in the  
1079 general phenylpropanoid pathway. *Plant Cell* [Internet]. American Society of Plant  
1080 Biologists; 1992 [cited 2017 Jun 13];4:1413–24. Available from:  
1081 <http://www.ncbi.nlm.nih.gov/pubmed/1477555>

1082 118. Gould PD, Diaz P, Hogben C, Kusakina J, Salem R, Hartwell J, et al. Delayed  
1083 fluorescence as a universal tool for the measurement of circadian rhythms in higher  
1084 plants. *Plant J.* [Internet]. 2009 [cited 2011 Jul 15];58:893–901. Available from:  
1085 <http://www.ncbi.nlm.nih.gov/pubmed/19638147>

1086 119. Sweeney BM, Prezelin BB, Wong D, Govindjee. In vivo Chlorophyll-a Fluorescence  
1087 Transients and the Circadian-Rhythm of Photosynthesis in *Gonyaulax-Polyedra*.  
1088 *Photochem. Photobiol.* 1979;30:309–11.

1089 120. Sheehan H, Moser M, Klahre U, Esfeld K, Dell’Olivo A, Mandel T, et al. MYB-FL  
1090 controls gain and loss of floral UV absorbance, a key trait affecting pollinator  
1091 preference and reproductive isolation. *Nat. Genet.* [Internet]. 2015; Available from:  
1092 <http://www.nature.com/doi/10.1038/ng.3462>

1093 121. Pérez-Bueno ML, Pineda M, Cabeza FM, Barón M. Multicolor Fluorescence  
1094 Imaging as a Candidate for Disease Detection in Plant Phenotyping. *Front. Plant Sci.*  
1095 [Internet]. Frontiers Media SA; 2016 [cited 2017 Jan 24];7:1790. Available from:  
1096 <http://www.ncbi.nlm.nih.gov/pubmed/27994607>

1097 122. Fang Y, Ramasamy R. Current and Prospective Methods for Plant Disease  
1098 Detection. *Biosensors* [Internet]. Multidisciplinary Digital Publishing Institute; 2015  
1099 [cited 2017 May 21];5:537–61. Available from: [http://www.mdpi.com/2079-  
1100 6374/5/3/537/](http://www.mdpi.com/2079-6374/5/3/537/)

1101 123. Boviki A. HANDBOOK OF IMAGE AND VIDEO PROCESSING.

1102 124. Zhang Y, Wang S, Sun P. Pathological brain detection based on wavelet entropy  
1103 and Hu moment invariants. *Bio-medical Mater.* [Internet]. 2015 [cited 2016 Oct 18];  
1104 Available from: [http://content.iospress.com/articles/bio-medical-materials-and-  
1105 engineering/bme1426](http://content.iospress.com/articles/bio-medical-materials-and-engineering/bme1426)

- 1106 125. Borisjuk L, Rolletschek H, Neuberger T. Surveying the plant's world by magnetic  
1107 resonance imaging. *Plant J.* [Internet]. 2012 [cited 2017 May 15];70:129–46. Available  
1108 from: <http://doi.wiley.com/10.1111/j.1365-313X.2012.04927.x>
- 1109 126. Rascher U, Blossfeld S, Fiorani F, Jahnke S, Jansen M, Kuhn AJ, et al. Non-invasive  
1110 approaches for phenotyping of enhanced performance traits in bean. *Funct. Plant Biol.*  
1111 2011;38:968–83.
- 1112 127. Horigane A, Engelaar W, Maruyama S. Visualisation of moisture distribution  
1113 during development of rice caryopses (*Oryza sativa* L.) by nuclear magnetic resonance  
1114 microimaging. *J. Cereal* [Internet]. 2001 [cited 2017 May 15]; Available from:  
1115 <http://www.sciencedirect.com/science/article/pii/S0733521000903485>
- 1116 128. Glidewell S. NMR imaging of developing barley grains. *J. Cereal Sci.* [Internet].  
1117 2006 [cited 2017 May 15]; Available from:  
1118 <http://www.sciencedirect.com/science/article/pii/S0733521005000913>
- 1119 129. Converse A, Ahlers E, Bryan T. Positron emission tomography (PET) of radiotracer  
1120 uptake and distribution in living plants: methodological aspects. *Radioanal. ...*  
1121 [Internet]. 2013 [cited 2017 May 15]; Available from:  
1122 <http://link.springer.com/article/10.1007/s10967-012-2383-9>
- 1123 130. Karve AA, Alexoff D, Kim D, Schueller MJ, Ferrieri RA, Babst BA. In vivo  
1124 quantitative imaging of photoassimilate transport dynamics and allocation in large  
1125 plants using a commercial positron emission tomography (PET) scanner. *BMC Plant*  
1126 *Biol.* [Internet]. 2015 [cited 2017 May 15];15:273. Available from:  
1127 <http://www.biomedcentral.com/1471-2229/15/273>
- 1128 131. Yang W, Xu X, Duan L, Luo Q, Chen S, Zeng S, et al. High-throughput measurement  
1129 of rice tillers using a conveyor equipped with x-ray computed tomography. *Rev. Sci.*  
1130 *Instrum.* [Internet]. 2011 [cited 2017 May 15];82:25102. Available from:  
1131 <http://aip.scitation.org/doi/10.1063/1.3531980>
- 1132 132. Tracy SR, Roberts JA, Black CR, McNeill A, Davidson R, Mooney SJ. The X-factor:  
1133 Visualizing undisturbed root architecture in soils using X-ray computed tomography. *J.*  
1134 *Exp. Bot.* 2010;61:311–3.
- 1135 133. Mooney SJ, Pridmore TP, Helliwell J, Bennett MJ. Developing X-ray computed  
1136 tomography to non-invasively image 3-D root systems architecture in soil. *Plant Soil.*  
1137 2012;352:1–22.

- 1 1138 134. Metzner R, Eggert A, van Dusschoten D, Pflugfelder D, Gerth S, Schurr U, et al.  
2 1139 Direct comparison of MRI and X-ray CT technologies for 3D imaging of root systems in  
3  
4 1140 soil: potential and challenges for root trait quantification. *Plant Methods* [Internet].  
5  
6 1141 2015 [cited 2017 May 15];11:17. Available from:  
7  
8 1142 <http://www.plantmethods.com/content/11/1/17>  
9  
10 1143 135. Lontoc-Roy M, Dutilleul P, Prasher SO, Han L, Brouillet T, Smith DL. Advances in  
11 1144 the acquisition and analysis of CT scan data to isolate a crop root system from the soil  
12  
13 1145 medium and quantify root system complexity in 3-D space. *Geoderma* [Internet]. 2006  
14  
15 1146 [cited 2017 May 16];137:231–41. Available from:  
16  
17 1147 <http://www.sciencedirect.com/science/article/pii/S0016706106002576>  
18  
19 1148 136. Perret JS, Al-Belushi ME, Deadman M. Non-destructive visualization and  
20  
21 1149 quantification of roots using computed tomography. *Soil Biol. Biochem.* [Internet].  
22  
23 1150 2007 [cited 2017 May 16];39:391–9. Available from:  
24  
25 1151 <http://www.sciencedirect.com/science/article/pii/S003807170600321X>  
26  
27 1152 137. Staedler YM, Masson D, Schönenberger J, Fischer G, Comes H. Plant Tissues in 3D  
28  
29 1153 via X-Ray Tomography: Simple Contrasting Methods Allow High Resolution Imaging.  
30  
31 1154 Sun M, editor. *PLoS One* [Internet]. Public Library of Science; 2013 [cited 2017 May  
32  
33 1155 16];8:e75295. Available from: <http://dx.plos.org/10.1371/journal.pone.0075295>  
34  
35 1156 138. Dhondt S, Vanhaeren H, Van Loo D, Cnudde V, Inzé D. Plant structure visualization  
36  
37 1157 by high-resolution X-ray computed tomography. *Trends Plant Sci.* [Internet]. 2010  
38  
39 1158 [cited 2017 May 16];15:419–22. Available from:  
40  
41 1159 <http://www.sciencedirect.com/science/article/pii/S1360138510000956>  
42  
43 1160 139. Brodersen CR, Roddy AB. New frontiers in the three-dimensional visualization of  
44  
45 1161 plant structure and function. *Am. J. Bot.* [Internet]. Botanical Society of America; 2016  
46  
47 1162 [cited 2017 May 16];103:184–8. Available from:  
48  
49 1163 <http://www.ncbi.nlm.nih.gov/pubmed/26865119>  
50  
51 1164 140. Jan Erik Solem. *Programming Computer Vision with Python*. Andy Oram, Mike  
52  
53 1165 Hendrikosn, editors. *Program. Comput. Vis. with Python* [Internet]. 1st ed. Sebastopol:  
54  
55 1166 O'Reilly Media; 2012;264. Available from: <http://programmingcomputervision.com/>  
56  
57 1167 141. Navarro PJ, P??rez F, Weiss J, Egea-Cortines M. Machine learning and computer  
58  
59 1168 vision system for phenotype data acquisition and analysis in plants. *Sensors*  
60  
61 1169 (Switzerland) [Internet]. Multidisciplinary Digital Publishing Institute; 2016 [cited 2016  
62  
63  
64  
65

- 1170 Sep 21];16:1–12. Available from: <http://www.mdpi.com/1424-8220/16/5/641>
- 1171 142. Hamuda E, Glavin M, Jones E. A survey of image processing techniques for plant  
1172 extraction and segmentation in the field [Internet]. *Comput. Electron. Agric.* 2016  
1173 [cited 2017 May 10]. p. 184–99. Available from:  
1174 <http://www.sciencedirect.com/science/article/pii/S0168169916301557>
- 1175 143. Krig S. *Computer vision metrics: Survey, Taxonomy, and Analysis*. Weiss S, Douglas  
1176 S, editors. ApressOpen; 2014.
- 1177 144. Wang Z, Li H, Zhu Y, Xu T. Review of Plant Identification Based on Image  
1178 Processing. *Arch. Comput. Methods Eng.* [Internet]. 2016 [cited 2017 May 10];  
1179 Available from: <http://link.springer.com/10.1007/s11831-016-9181-4>
- 1180 145. Bhagwat R, Dandawate Y. Indian plant species identification under varying  
1181 illumination and viewpoint conditions. 2016 Conf. Adv. Signal Process. [Internet]. IEEE;  
1182 2016 [cited 2017 May 9]. p. 469–73. Available from:  
1183 <http://ieeexplore.ieee.org/document/7746217/>
- 1184 146. Thangadurai K, Padmavathi K. Computer vision image enhancement for plant  
1185 leaves disease detection. *Proc. - 2014 World Congr. Comput. Commun. Technol.*  
1186 *WCCCT 2014* [Internet]. IEEE; 2014 [cited 2017 May 10]. p. 173–5. Available from:  
1187 <http://ieeexplore.ieee.org/document/6755131/>
- 1188 147. Padmavathi K, Thangadurai K. Implementation of RGB and grayscale images in  
1189 plant leaves disease detection - Comparative study. *Indian J. Sci. Technol.* [Internet].  
1190 2016 [cited 2017 May 20];9. Available from:  
1191 <http://www.indjst.org/index.php/indjst/article/view/77739>
- 1192 148. Wilkinson MD, Dumontier M, Aalbersberg IJ, Appleton G, Axton M, Baak A, et al.  
1193 The FAIR Guiding Principles for scientific data management and stewardship. *Sci. Data*  
1194 [Internet]. 2016;3:160018. Available from:  
1195 [http://www.pubmedcentral.nih.gov/articlerender.fcgi?artid=4792175&tool=pmcentre  
1196 z&rendertype=abstract](http://www.pubmedcentral.nih.gov/articlerender.fcgi?artid=4792175&tool=pmcentrez&rendertype=abstract)
- 1197 149. Singh V, Misra AK. Detection of plant leaf diseases using image segmentation and  
1198 soft computing techniques. *Inf. Process. Agric.* [Internet]. 2017 [cited 2017 May  
1199 30];4:41–9. Available from:  
1200 <http://www.sciencedirect.com/science/article/pii/S2214317316300154>
- 1201 150. Zhao ZQ, Ma LH, Cheung Y ming, Wu X, Tang Y, Chen CLP. ApLeaf: An efficient

1 1202 android-based plant leaf identification system. *Neurocomputing* [Internet]. 2015 [cited  
2 1203 2017 May 30];151:1112–9. Available from:  
3  
4 1204 <http://www.sciencedirect.com/science/article/pii/S0925231214013368>  
5  
6 1205 151. Otsu N. A Threshold Selection Method from Gray-Level Histograms. *IEEE Trans.*  
7 1206 *Syst. Man. Cybern.* [Internet]. 1979 [cited 2017 May 30];9:62–6. Available from:  
8  
9 1207 <http://ieeexplore.ieee.org/document/4310076/>  
10  
11 1208 152. Liu J-C, Lin T-M. Location and Image-Based Plant Recognition and Recording  
12  
13 1209 System. 2015 [cited 2017 May 30];6. Available from:  
14  
15 1210 <http://www.jihmsp.org/~jihmsp/2015/vol6/JIH-MSP-2015-05-007.pdf>  
16  
17 1211 153. Chéné Y, Rousseau D, Belin É tienn., Garbez M, Galopin G, Chapeau-Blondeau F.  
18  
19 1212 Shape descriptors to characterize the shoot of entire plant from multiple side views of  
20  
21 1213 a motorized depth sensor. *Mach. Vis. Appl.* [Internet]. Springer Berlin Heidelberg; 2016  
22  
23 1214 May 19 [cited 2017 May 30];1–15. Available from:  
24  
25 1215 <http://link.springer.com/10.1007/s00138-016-0762-x>  
26  
27 1216 154. Vincent L, Vincent L, Soille P. Watersheds in Digital Spaces: An Efficient Algorithm  
28  
29 1217 Based on Immersion Simulations. *IEEE Trans. Pattern Anal. Mach. Intell.* [Internet].  
30  
31 1218 1991 [cited 2017 May 30];13:583–98. Available from:  
32  
33 1219 <http://ieeexplore.ieee.org/document/87344/>  
34  
35 1220 155. Patil S, Soma S, Nandyal S. Identification of Growth Rate of Plant based on leaf  
36  
37 1221 features using Digital Image Processing Techniques. *Int. J. Emerg. Technol. Adv. Eng.*  
38  
39 1222 Website [www.ijetae.com](http://www.ijetae.com) ISO Certif. J. 2013;3.  
40  
41 1223 156. Barnes C, Balzter H, Barrett K, Eddy J, Milner S, Suárez J. Individual Tree Crown  
42  
43 1224 Delineation from Airborne Laser Scanning for Diseased Larch Forest Stands. *Remote*  
44  
45 1225 *Sens.* [Internet]. Multidisciplinary Digital Publishing Institute; 2017 [cited 2017 Apr  
46  
47 1226 24];9:231. Available from: <http://www.mdpi.com/2072-4292/9/3/231>  
48  
49 1227 157. Vukadinovic D, Polder G. Watershed and supervised classification based fully  
50  
51 1228 automated method for separate leaf segmentation. *COST FA 1306 -The quest Toler.*  
52  
53 1229 *Var. plant Cell. Lev. Gatersleben*; 2015.  
54  
55 1230 158. Rother C, Kolmogorov V, Blake A. GrabCut -Interactive Foreground Extraction  
56  
57 1231 using Iterated Graph Cuts. *ACM Trans. Graph.* [Internet]. 2004. Available from:  
58  
59 1232 [https://www.microsoft.com/en-us/research/publication/grabcut-interactive-](https://www.microsoft.com/en-us/research/publication/grabcut-interactive-foreground-extraction-using-iterated-graph-cuts/)  
60  
61 1233 [foreground-extraction-using-iterated-graph-cuts/](https://www.microsoft.com/en-us/research/publication/grabcut-interactive-foreground-extraction-using-iterated-graph-cuts/)  
62  
63  
64  
65

- 1234 159. Boykov YY, Jolly M-P. Interactive graph cuts for optimal boundary & region  
1235 segmentation of objects in N-D images. Proc. Eighth IEEE Int. Conf. Comput. Vision.  
1236 ICCV 2001 [Internet]. IEEE Comput. Soc; 2001 [cited 2016 Nov 3]. p. 105–12. Available  
1237 from: <http://ieeexplore.ieee.org/document/937505/>  
1238 160. Sonka M, Hlavac V, Boyle R. Image Processing, Analysis, and Machine Vision. 3rd  
1239 ed. Thomson, editor. Toronto: Thomson; 2008.  
1240 161. Wang X. The GrabCut Segmentation Technique as Used in the Study of Tree Image  
1241 Extraction. In: Zhu FG and X, editor. Proc. 2009 Int. Work. Inf. Secur. Appl. (IWISA  
1242 2009). Qingdao, China: Academy Publisher; 2009.  
1243 162. Liu J-C, Chiang C-Y, Chen S. Image-Based Plant Recognition by Fusion of  
1244 Multimodal Information. 2016 10th Int. Conf. Innov. Mob. Internet Serv. Ubiquitous  
1245 Comput. [Internet]. IEEE; 2016 [cited 2017 May 30]. p. 5–11. Available from:  
1246 <http://ieeexplore.ieee.org/document/7794433/>  
1247 163. Liu J-C, Lin T-M. Location and Image-Based Plant Recognition and Recording  
1248 System. 2015;6.  
1249 164. Kass M, Witkin A, Terzopoulos D. Snakes: Active contour models. Int. J. Comput.  
1250 Vis. [Internet]. Kluwer Academic Publishers; 1988 [cited 2016 Nov 5];1:321–31.  
1251 Available from: <http://link.springer.com/10.1007/BF00133570>  
1252 165. Minervini M, Abdelsamea MM, Tsaftaris SA. Image-based plant phenotyping with  
1253 incremental learning and active contours. Ecol. Inform. 2014;23:35–48.  
1254 166. Suta L, Bessy F, Veja C, Vaida M-F. Active contours: Application to plant  
1255 recognition. 2012 IEEE 8th Int. Conf. Intell. Comput. Commun. Process. [Internet]. IEEE;  
1256 2012 [cited 2016 Nov 5]. p. 181–7. Available from:  
1257 <http://ieeexplore.ieee.org/document/6356183/>  
1258 167. Shi Y, Karl WC. A real-time algorithm for the approximation of level-set-based  
1259 curve evolution. IEEE Trans. Image Process. [Internet]. 2008 [cited 2016 Nov  
1260 5];17:645–56. Available from: <http://ieeexplore.ieee.org/document/4480128/>  
1261 168. Chan TF, Vese LA. Active contours without edges. IEEE Trans. Image Process.  
1262 [Internet]. IEEE Press; 2001 [cited 2016 Nov 5];10:266–77. Available from:  
1263 <http://ieeexplore.ieee.org/document/902291/>  
1264 169. Pape J-M, Klukas C. Utilizing machine learning approaches to improve the  
1265 prediction of leaf counts and individual leaf segmentation of rosette plant images.

1266 Proc. Comput. Vis. Probl. Plant Phenotyping [Internet]. British Machine Vision  
1 1267 Association; 2015 [cited 2016 Sep 21];1–12. Available from:  
2  
3 1268 <http://www.bmva.org/bmvc/2015/cvppp/papers/paper003/index.html>  
4  
5 1269 170. Arivazhagan S, Shebiah RN, Ananthi S, Vishnu Varthini S. Detection of unhealthy  
6 region of plant leaves and classification of plant leaf diseases using texture features.  
7 1270 Agric. Eng. Int. CIGR J. 2013;15:211–7.  
8  
9 1271 171. Mouille G, Robin S, Lecomte M, Pagant S, Höfte H. Classification and identification  
10 of *Arabidopsis* cell wall mutants using Fourier-Transform InfraRed (FT-IR)  
11 1272 microspectroscopy. Plant J. [Internet]. Blackwell Science Ltd; 2003 [cited 2017 May  
12 1273 27];35:393–404. Available from: <http://doi.wiley.com/10.1046/j.1365->  
13 1274 313X.2003.01807.x  
14  
15 1275 172. Guijarro M, Riomoros I, Pajares G, Zitinski P. Discrete wavelets transform for  
16 1276 improving greenness image segmentation in agricultural images. Comput. Electron.  
17 1277 Agric. 2015;118:396–407.  
18  
19 1278 173. Iyer-Pascuzzi AS, Symonova O, Mileyko Y, Hao Y, Belcher H, Harer J, et al. Imaging  
20 1279 and analysis platform for automatic phenotyping and trait ranking of plant root  
21 1280 systems. Plant Physiol. [Internet]. American Society of Plant Biologists; 2010 [cited  
22 1281 2017 May 28];152:1148–57. Available from:  
23 1282 <http://www.ncbi.nlm.nih.gov/pubmed/20107024>  
24  
25 1283 174. Lowe DG. Distinctive Image Features from Scale-Invariant Keypoints. Int. J.  
26 1284 Comput. Vis. [Internet]. Kluwer Academic Publishers; 2004 [cited 2016 Dec 7];60:91–  
27 1285 110. Available from: <http://link.springer.com/10.1023/B:VISI.0000029664.99615.94>  
28  
29 1286 175. Bay H, Ess A, Tuytelaars T, Van Gool L. Speeded-Up Robust Features (SURF).  
30 1287 Comput. Vis. Image Underst. 2008;110:346–59.  
31  
32 1288 176. Dalal N, Triggs B. Histograms of Oriented Gradients for Human Detection. 2005  
33 1289 IEEE Comput. Soc. Conf. Comput. Vis. Pattern Recognit. [Internet]. IEEE; [cited 2016  
34 1290 Dec 9]. p. 886–93. Available from: <http://ieeexplore.ieee.org/document/1467360/>  
35  
36 1291 177. Guo W, Fukatsu T, Ninomiya S. Automated characterization of flowering dynamics  
37 1292 in rice using field-acquired time-series RGB images. Plant Methods [Internet]. 2015  
38 1293 [cited 2017 May 28];11:7. Available from:  
39 1294 <http://www.plantmethods.com/content/11/1/7>  
40  
41 1295 178. Santos T, Oliveira A. Image-based 3D digitizing for plant architecture analysis and  
42  
43  
44  
45  
46  
47  
48  
49  
50  
51  
52  
53  
54  
55  
56  
57  
58  
59  
60  
61  
62  
63  
64  
65

1298 phenotyping. ... SIBGRAPI 2012 (XXV Conf. ... [Internet]. 2012 [cited 2016 Dec 8];  
1299 Available from: [http://www.cnptia.embrapa.br/~thiago/pool/2012-08-24\\_sibgrapi.pdf](http://www.cnptia.embrapa.br/~thiago/pool/2012-08-24_sibgrapi.pdf)  
1300 179. Roscher R, Herzog K, Kunkel A, Kicherer A, T??pfer R, F??rstner W. Automated  
1301 image analysis framework for high-throughput determination of grapevine berry sizes  
1302 using conditional random fields. *Comput. Electron. Agric.* [Internet]. 2014 [cited 2017  
1303 May 29];100:148–58. Available from:  
1304 <http://www.sciencedirect.com/science/article/pii/S0168169913002780>  
1305 180. Lantz B. *Machine Learning with R*. 1st ed. Jones J, Sheikh A, editors. Birmingham:  
1306 Packt Publishing; 2013.  
1307 181. Müller A, Guido S. *Introduction to Machine Learning with Python*. 1st ed.  
1308 Schanafelt D, editor. Sebastopol: O’Reilly Media; 2016.  
1309 182. Smola A, Vishwanathan SV. *Introduction to Machine Learning*. 1st ed. Cambridge:  
1310 Cambridge University Press; 2008.  
1311 183. Baranowski P, Jedryczka M, Mazurek W, Babula-Skowronska D, Siedliska A,  
1312 Kaczmarek J. Hyperspectral and thermal imaging of oilseed rape (*Brassica napus*)  
1313 response to fungal species of the genus *Alternaria*. Wilson RA, editor. *PLoS One*  
1314 [Internet]. Public Library of Science; 2015 [cited 2016 Nov 6];10:e0122913. Available  
1315 from: <http://dx.plos.org/10.1371/journal.pone.0122913>  
1316 184. Fukushima K. Neocognitron: a self organizing neural network model for a  
1317 mechanism of pattern recognition unaffected by shift in position. *Biol. Cybern.*  
1318 [Internet]. 1980 [cited 2016 Nov 6];36:193–202. Available from:  
1319 <http://www.ncbi.nlm.nih.gov/pubmed/7370364>  
1320 185. Pound MP, Burgess AJ, Wilson MH, Atkinson JA, Griffiths M, Jackson AS, et al.  
1321 *Deep Machine Learning provides state-of-the-art performance in image-based plant*  
1322 *phenotyping*. *bioRxiv* [Internet]. 2016 [cited 2016 Sep 21];53033. Available from:  
1323 <http://biorxiv.org/lookup/doi/10.1101/053033>  
1324 186. Mohanty SP, Hughes D, Salathé M. *Using Deep Learning for Image-Based Plant*  
1325 *Disease Detection*. 2016;1–7.  
1326 187. Tsafaris SA, Minervini M, Schar H. *Machine Learning for Plant Phenotyping*  
1327 *Needs Image Processing* [Internet]. *Trends Plant Sci*. 2016 [cited 2017 May 27]. p. 989–  
1328 91. Available from: <http://linkinghub.elsevier.com/retrieve/pii/S1360138516301613>  
1329 188. Naik HS, Zhang J, Lofquist A, Assefa T, Sarkar S, Ackerman D, et al. A real-time



1330 phenotyping framework using machine learning for plant stress severity rating in  
1331 soybean. *Plant Methods* [Internet]. 2017 [cited 2017 May 29];13:23. Available from:  
1332 <http://plantmethods.biomedcentral.com/articles/10.1186/s13007-017-0173-7>  
1333 189. Nagler PL, Inoue Y, Glenn E., Russ A., Daughtry CS. Cellulose absorption index  
1334 (CAI) to quantify mixed soil–plant litter scenes. *Remote Sens. Environ.* 2003;87:310–  
1335 25.  
1336 190. Ren H, Zhou G, Zhang F, Zhang X. Evaluating cellulose absorption index (CAI) for  
1337 non-photosynthetic biomass estimation in the desert steppe of Inner Mongolia.  
1338 *Chinese Sci. Bull.* SP Science China Press; 2012;57:1716–22.  
1339 191. Serbin G, Daughtry CST, Hunt ER, Reeves JB, Brown DJ. Effects of soil composition  
1340 and mineralogy on remote sensing of crop residue cover. *Remote Sens. Environ.*  
1341 2009;113:224–38.  
1342 192. Eskandari I, Navid H, Rangzan K. Evaluating spectral indices for determining  
1343 conservation and conventional tillage systems in a vetch-wheat rotation. *Int. Soil*  
1344 *Water Conserv. Res.* 2016;4:93–8.  
1345 193. Galvão LS, Formaggio AR, Tisot DA. Discrimination of sugarcane varieties in  
1346 Southeastern Brazil with EO-1 Hyperion data. *Remote Sens. Environ.* 2005;94:523–34.  
1347 194. Price J. Leaf area index estimation from visible and near-infrared reflectance data.  
1348 *Remote Sens. Environ.* 1995;52:55–65.  
1349 195. Zarco-Tejada P, Berjón A, Miller J. Stress detection in crops with hyperspectral  
1350 remote sensing and physical simulation models. *Proc. Airborne.* 2004;  
1351 196. Cai J, Golzarian MR, Miklavcic SJ. Novel Image Segmentation Based on Machine  
1352 Learning and Its Application to Plant Analysis. *Int. J. Inf. Electron. Eng.* 2011;1.  
1353 197. Gong P, Pu R, Biging G. Estimation of forest leaf area index using vegetation  
1354 indices derived from Hyperion hyperspectral data. *IEEE Trans.* 2003;  
1355 198. Brown HE, Diuk-Wasser MA, Guan Y, Caskey S, Fish D. Comparison of three  
1356 satellite sensors at three spatial scales to predict larval mosquito presence in  
1357 Connecticut wetlands. *Remote Sens. Environ.* 2008;112:2301–8.  
1358 199. Apan A, Held A, Phinn S, Markley J. Detecting sugarcane “orange rust” disease  
1359 using EO-1 Hyperion hyperspectral imagery. *Int. J. Remote Sens.* Taylor & Francis  
1360 Group ; 2004;25:489–98.  
1361 200. Tucker CJ, Slayback DA, Pinzon JE, Los SO, Myneni RB, Taylor MG. Higher northern

1362 latitude normalized difference vegetation index and growing season trends from 1982  
1363 to 1999. *Int. J. Biometeorol.* Springer-Verlag; 2001;45:184–90.

1364 201. Haboudane D, Miller JR, Pattey E, Zarco-Tejada PJ, Strachan IB. Hyperspectral  
1365 vegetation indices and novel algorithms for predicting green LAI of crop canopies:  
1366 Modeling and validation in the context of precision agriculture. *Remote Sens. Environ.*  
1367 2004;90:337–52.

1368 202. Pagani A, Echeverría HE, Andrade FH, Sainz Rozas HR. Characterization of Corn  
1369 Nitrogen Status with a Greenness Index under Different Availability of Sulfur. *Agron. J.*  
1370 American Society of Agronomy; 2009;101:315.

1371 203. Blackburn GA. Spectral indices for estimating photosynthetic pigment  
1372 concentrations: A test using senescent tree leaves. *Int. J. Remote Sens.* Taylor &  
1373 Francis Group ; 1998;19:657–75.

1374 204. Hunt ER, Dean Hively W, Fujikawa SJ, Linden DS, Daughtry CST, McCarty GW.  
1375 Acquisition of NIR-green-blue digital photographs from unmanned aircraft for crop  
1376 monitoring. *Remote Sens. Molecular Diversity Preservation International*; 2010;2:290–  
1377 305.

1378 205. Bell GE, Howell BM, Johnson GV, Raun WR, Solie JB, Stone ML. Optical Sensing of  
1379 Turfgrass Chlorophyll Content and Tissue Nitrogen. *HortScience.* American Society for  
1380 Horticultural Science; 2004;39:1130–2.

1381 206. Haboudane D, Miller JR, Tremblay N, Zarco-Tejada PJ, Dextraze L. Integrated  
1382 narrow-band vegetation indices for prediction of crop chlorophyll content for  
1383 application to precision agriculture. *Remote Sens. Environ.* 2002;81:416–26.

1384 207. Timm BC, McGarigal K. Fine-scale remotely-sensed cover mapping of coastal dune  
1385 and salt marsh ecosystems at Cape Cod National Seashore using Random Forests.  
1386 *Remote Sens. Environ.* 2012;127:106–17.

1387 208. Parenteau MP, Bannari A, El-Harti A, Bachaoui M, El-Ghmari A. Characterization of  
1388 the state of soil degradation by erosion using the hue and coloration indices. *IGARSS*  
1389 2003. 2003 IEEE Int. Geosci. Remote Sens. Symp. Proc. (IEEE Cat. No.03CH37477). IEEE;  
1390 p. 2284–6.

1391

1392

1393 Tables

1394 Table 1. List of software tools for image processing

| Vision libraries                                                    | Source                                                                                                                                                                                                                                                                                                                                                       | Language                 |
|---------------------------------------------------------------------|--------------------------------------------------------------------------------------------------------------------------------------------------------------------------------------------------------------------------------------------------------------------------------------------------------------------------------------------------------------|--------------------------|
| OpenCV<br>EmguCV                                                    | <a href="http://opencv.org">http://opencv.org</a><br><a href="http://www.emgu.com/">http://www.emgu.com/</a>                                                                                                                                                                                                                                                 | C++, Python,<br>Java, C# |
| PlantCV<br>Scikit-image                                             | <a href="http://plantcv.danforthcenter.org">http://plantcv.danforthcenter.org</a><br><a href="http://scikit-image.org">http://scikit-image.org</a>                                                                                                                                                                                                           | Python                   |
| Bioimagetools,<br>bayesimages, edci, DRIP,<br>dpmixsim, raster, ... | <a href="https://cran.r-project.org/">https://cran.r-project.org/</a>                                                                                                                                                                                                                                                                                        | R                        |
| Cimg<br>Simplecv<br>Fastcv<br><br>Ccv<br>Vxl                        | <a href="http://cimg.eu">http://cimg.eu</a><br><a href="http://Simplecv.org">http://Simplecv.org</a><br><a href="https://developer.qualcomm.com/software/fastcv-sdk">https://developer.qualcomm.com/software/fastcv-<br/>sdk</a><br><a href="http://libccv.org">http://libccv.org</a><br><a href="http://vxl.sourceforge.net">http://vxl.sourceforge.net</a> | C++                      |
| BoofCV<br>OpenIMAJ<br>JavaCV                                        | <a href="http://boofcv.org">http://boofcv.org</a><br><a href="http://openimaj.org">http://openimaj.org</a><br><a href="https://github.com/bytedeco/javacv">https://github.com/bytedeco/javacv</a>                                                                                                                                                            | Java                     |

1395

1396

1397  
1398  
1399  
1400

Table 2. A list of indexes, the corresponding wavelength ranges and their use to analyse plant material.

| <b>Index</b>                                                | <b>Range nm</b> | <b>Applications</b>                                                                                                                                                                      |
|-------------------------------------------------------------|-----------------|------------------------------------------------------------------------------------------------------------------------------------------------------------------------------------------|
| <b>CAI</b> – Cellulose Absorption Index                     | 2200-2000       | Quantification mixed soil–plant litter scenes [189], estimation of non-photosynthetic biomass [190]                                                                                      |
| <b>LCA</b> – Lignin-Cellulose Absorption Index              | 2365-2145       | Measure the effects of soil composition and mineralogy of crop residue cover [191]                                                                                                       |
| <b>NTDI</b> – Normalized Difference Tillage Index           | 2359-1150       | Used for identifying crop residue cover in conventional and conservation tillage systems [192]                                                                                           |
| <b>LWVI-1</b> – Normalized Difference Leaf water VI 2       | 1094-893        | Discrimination of sugarcane varieties, allowed to detect large amounts of non photosynthetically-active constituents within the canopy [193]                                             |
| <b>DLAI</b> – Difference Leaf Area Index                    | 1725-970        | Used for estimating leaf area index based on the radiation measurements in the visible and near-infrared [194]                                                                           |
| <b>PWI</b> – Plant Water Index                              | 970-902         | Water content estimation and study of the characteristics of canopy spectrum and growth status [195][196]                                                                                |
| <b>NLI</b> – Nonlinear vegetation index                     | 1400-780        | Measurement of plant leaf water content. In combination with others indexes can detect interaction of biochemicals such as protein, nitrogen, lignin, cellulose, sugar, and starch [197] |
| <b>DWSI</b> – Disease water stress index                    | 1657-547        | To predict larval mosquito presence in wetland [198]and detect sugarcane 'orange rust' disease [199]                                                                                     |
| <b>NDVI</b> – Normalized Difference Vegetation Index        | 800-670         | Measurement significant variations in photosynthetic activity and growing season length at different latitudes [200]                                                                     |
| <b>MCARI</b> – Modified Chlorophyll Absorption Ratio Index  | 700-670         | Study of vegetation biophysical parameters, as well as to external factors affecting canopy reflectance [201]                                                                            |
| <b>GI</b> – Greenness Index                                 | 670-550         | Characterization of corn nitrogen status [202]                                                                                                                                           |
| <b>CAR</b> – Chlorophyll absorption ratio                   | 700-500         | Estimating the concentration of individual photosynthetic pigments within vegetation [203]                                                                                               |
| <b>GNDVI</b> – Green normalized difference vegetation index | 800-550         | Providing important information for site-specific agricultural decision making [204] and for identification of chlorophyll content and tissue nitrogen [205]                             |
| <b>OSAVI</b> – Optimized Soil Adjusted Vegetation Index     | 800-670         | Measurement with high sensitive of chlorophyll content variations and very resistant to the variations of LAI and solar zenith angle [206]                                               |
| <b>CI r</b> – Coloration Index red                          | 780-710         | Mapping of coastal dune and salt marsh ecosystems [207]                                                                                                                                  |
| <b>CI g</b> – Coloration Index green                        | 780-550         | Characterization of the state of soil degradation by erosion [208]                                                                                                                       |

1401  
1402  
1403

1404

1 1405

- 2
- 3
- 4
- 5
- 6
- 7
- 8
- 9
- 10
- 11
- 12
- 13
- 14
- 15
- 16
- 17
- 18
- 19
- 20
- 21
- 22
- 23
- 24
- 25
- 26
- 27
- 28
- 29
- 30
- 31
- 32
- 33
- 34
- 35
- 36
- 37
- 38
- 39
- 40
- 41
- 42
- 43
- 44
- 45
- 46
- 47
- 48
- 49
- 50
- 51
- 52
- 53
- 54
- 55
- 56
- 57
- 58
- 59
- 60
- 61
- 62
- 63
- 64
- 65

1406 Table 3. List of Machine Learning software libraries and their languages

1407

| Libraries ML/DL                                                                                               | Source                                                                                                                                                                                                                                                                                                                                                                                                                                                                                                                                                            | Language   |
|---------------------------------------------------------------------------------------------------------------|-------------------------------------------------------------------------------------------------------------------------------------------------------------------------------------------------------------------------------------------------------------------------------------------------------------------------------------------------------------------------------------------------------------------------------------------------------------------------------------------------------------------------------------------------------------------|------------|
| MICE, rpart, Party, CARET, randomForest, nnet, e1071, KernLab, igrph, glmnet, ROCR, tree, Rweka, earth, klaR, | <a href="https://cran.r-project.org/">https://cran.r-project.org/</a>                                                                                                                                                                                                                                                                                                                                                                                                                                                                                             | R          |
| Scikit-learn<br>Tensorflow<br>Theano<br>Pylearn2,<br>NuPIC<br>Caffe<br>PyBrain                                | <a href="http://scikit-learn.org/stable/">http://scikit-learn.org/stable/</a><br><a href="https://www.tensorflow.org/">https://www.tensorflow.org/</a><br><a href="http://deeplearning.net/software/theano">http://deeplearning.net/software/theano</a><br><a href="http://deeplearning.net/software/pylearn2">http://deeplearning.net/software/pylearn2</a><br><a href="http://numenta.org/">http://numenta.org/</a><br><a href="http://caffe.berkeleyvision.org/">http://caffe.berkeleyvision.org/</a><br><a href="http://pybrain.org/">http://pybrain.org/</a> | Python     |
| Weka<br>Spark<br>Mallet<br>JSAT<br>ELKI<br>Java-ML                                                            | <a href="http://www.cs.waikato.ac.nz/ml/weka/">http://www.cs.waikato.ac.nz/ml/weka/</a><br><a href="http://spark.apache.org/">http://spark.apache.org/</a><br><a href="http://mallet.cs.umass.edu/">http://mallet.cs.umass.edu/</a><br><a href="https://github.com/EdwardRaff/JSAT">https://github.com/EdwardRaff/JSAT</a><br><a href="http://elki.dbs.ifi.lmu.de/">http://elki.dbs.ifi.lmu.de/</a><br><a href="http://java-ml.sourceforge.net/">http://java-ml.sourceforge.net/</a>                                                                              | Java       |
| Accord<br>Multiboost<br>Shogun<br>LibSVM<br>mlpack<br>Shark<br>MLC++                                          | <a href="http://accord-framework.net/">http://accord-framework.net/</a><br><a href="http://www.multiboost.org/">http://www.multiboost.org/</a><br><a href="http://shogun-toolbox.org/">http://shogun-toolbox.org/</a><br><a href="http://www.csie.ntu.edu.tw/~cjlin/libsvm/">http://www.csie.ntu.edu.tw/~cjlin/libsvm/</a><br><a href="http://mlpack.org/">http://mlpack.org/</a><br><a href="http://image.diku.dk/shark/">http://image.diku.dk/shark/</a><br><a href="http://www.sgi.com/tech/mlc/source.html">http://www.sgi.com/tech/mlc/source.html</a>       | C#, C++, C |

1408

1409

1410

1411

1412 Figure Legends  
1 1413  
2 1414  
3  
4 1415  
5  
6 1416 **Figure 1.** Basic workflow in computer vision-based plant phenotyping  
7  
8 1417 **Figure 2.** An overview of different spectra used for phenotyping and the associated  
9  
10 1418 cameras. Names of different indexes are found in Table 2.  
11 1419  
12  
13  
14  
15  
16  
17  
18  
19  
20  
21  
22  
23  
24  
25  
26  
27  
28  
29  
30  
31  
32  
33  
34  
35  
36  
37  
38  
39  
40  
41  
42  
43  
44  
45  
46  
47  
48  
49  
50  
51  
52  
53  
54  
55  
56  
57  
58  
59  
60  
61  
62  
63  
64  
65

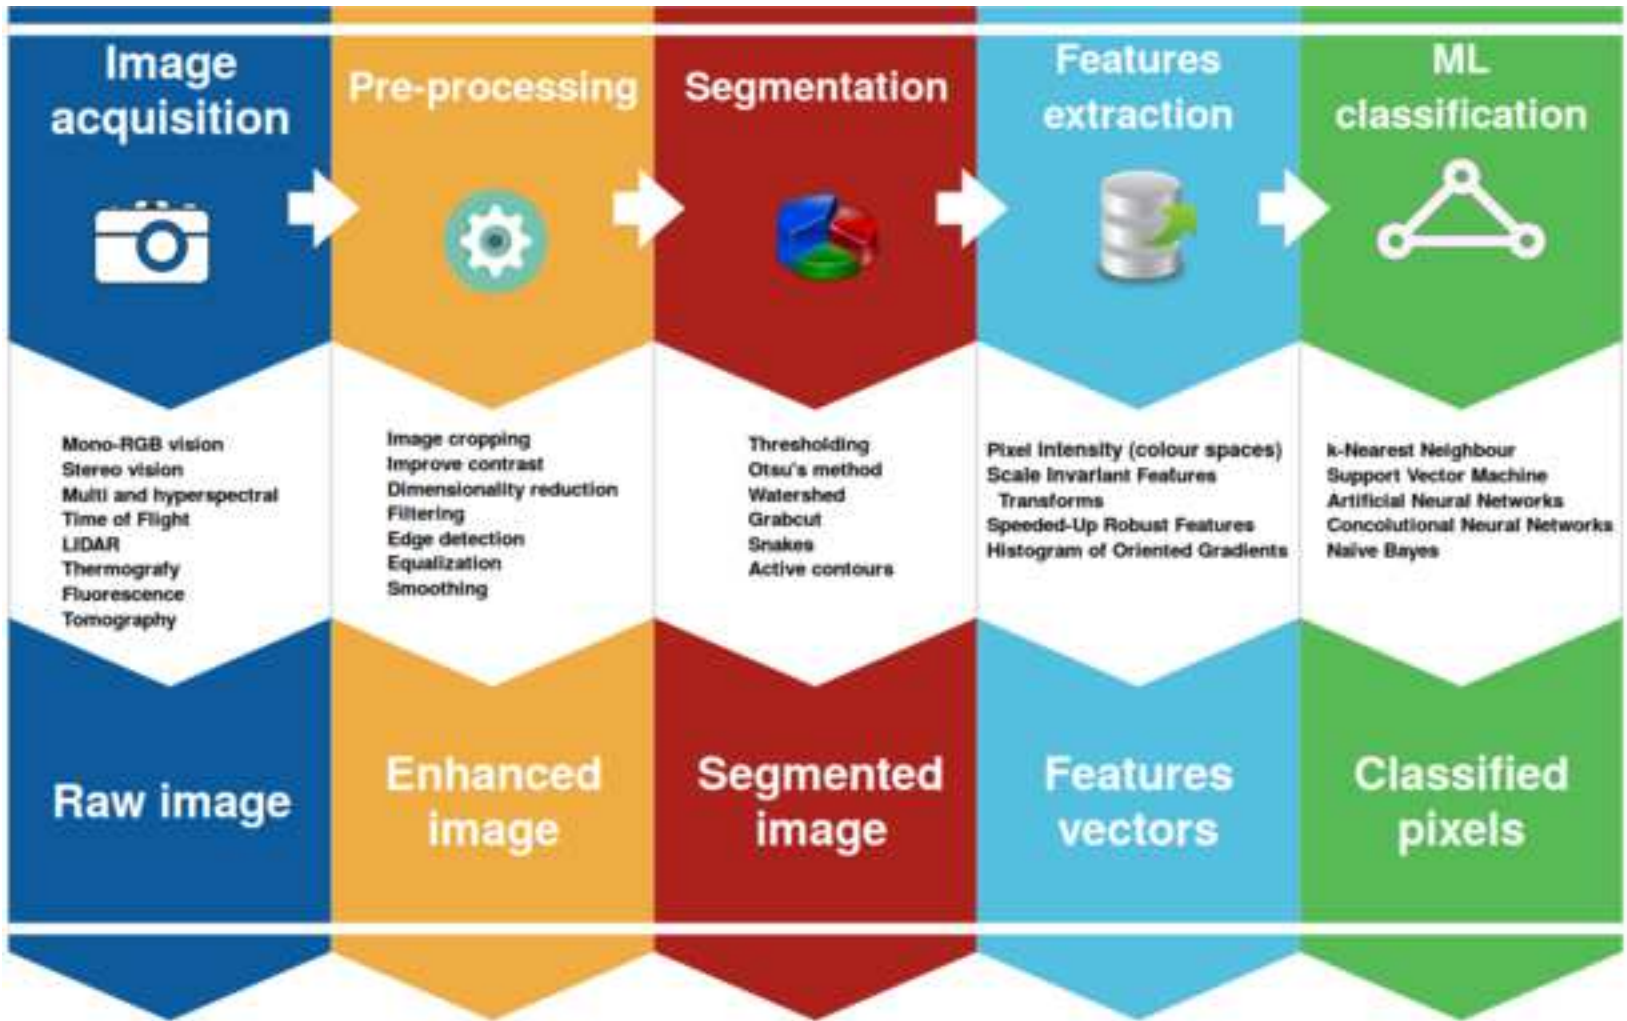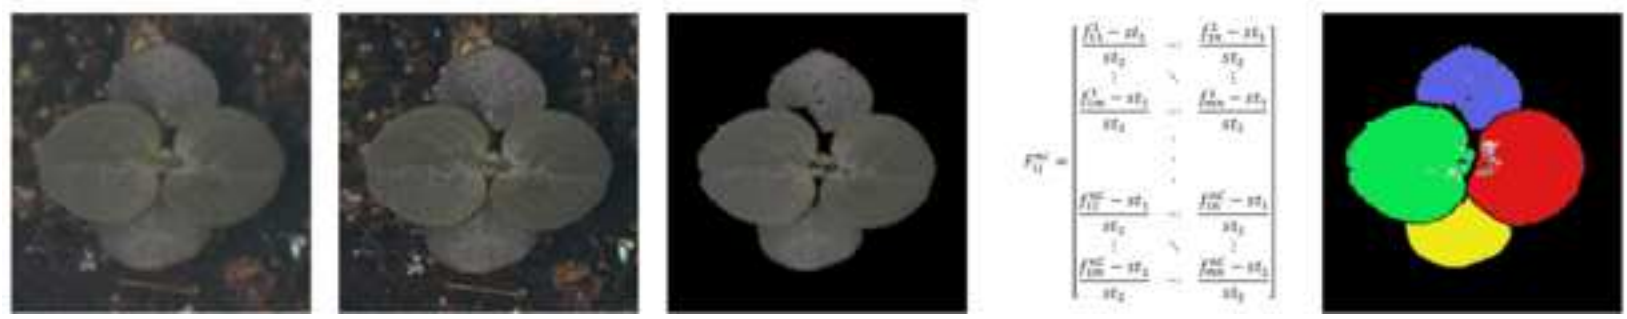



Figure

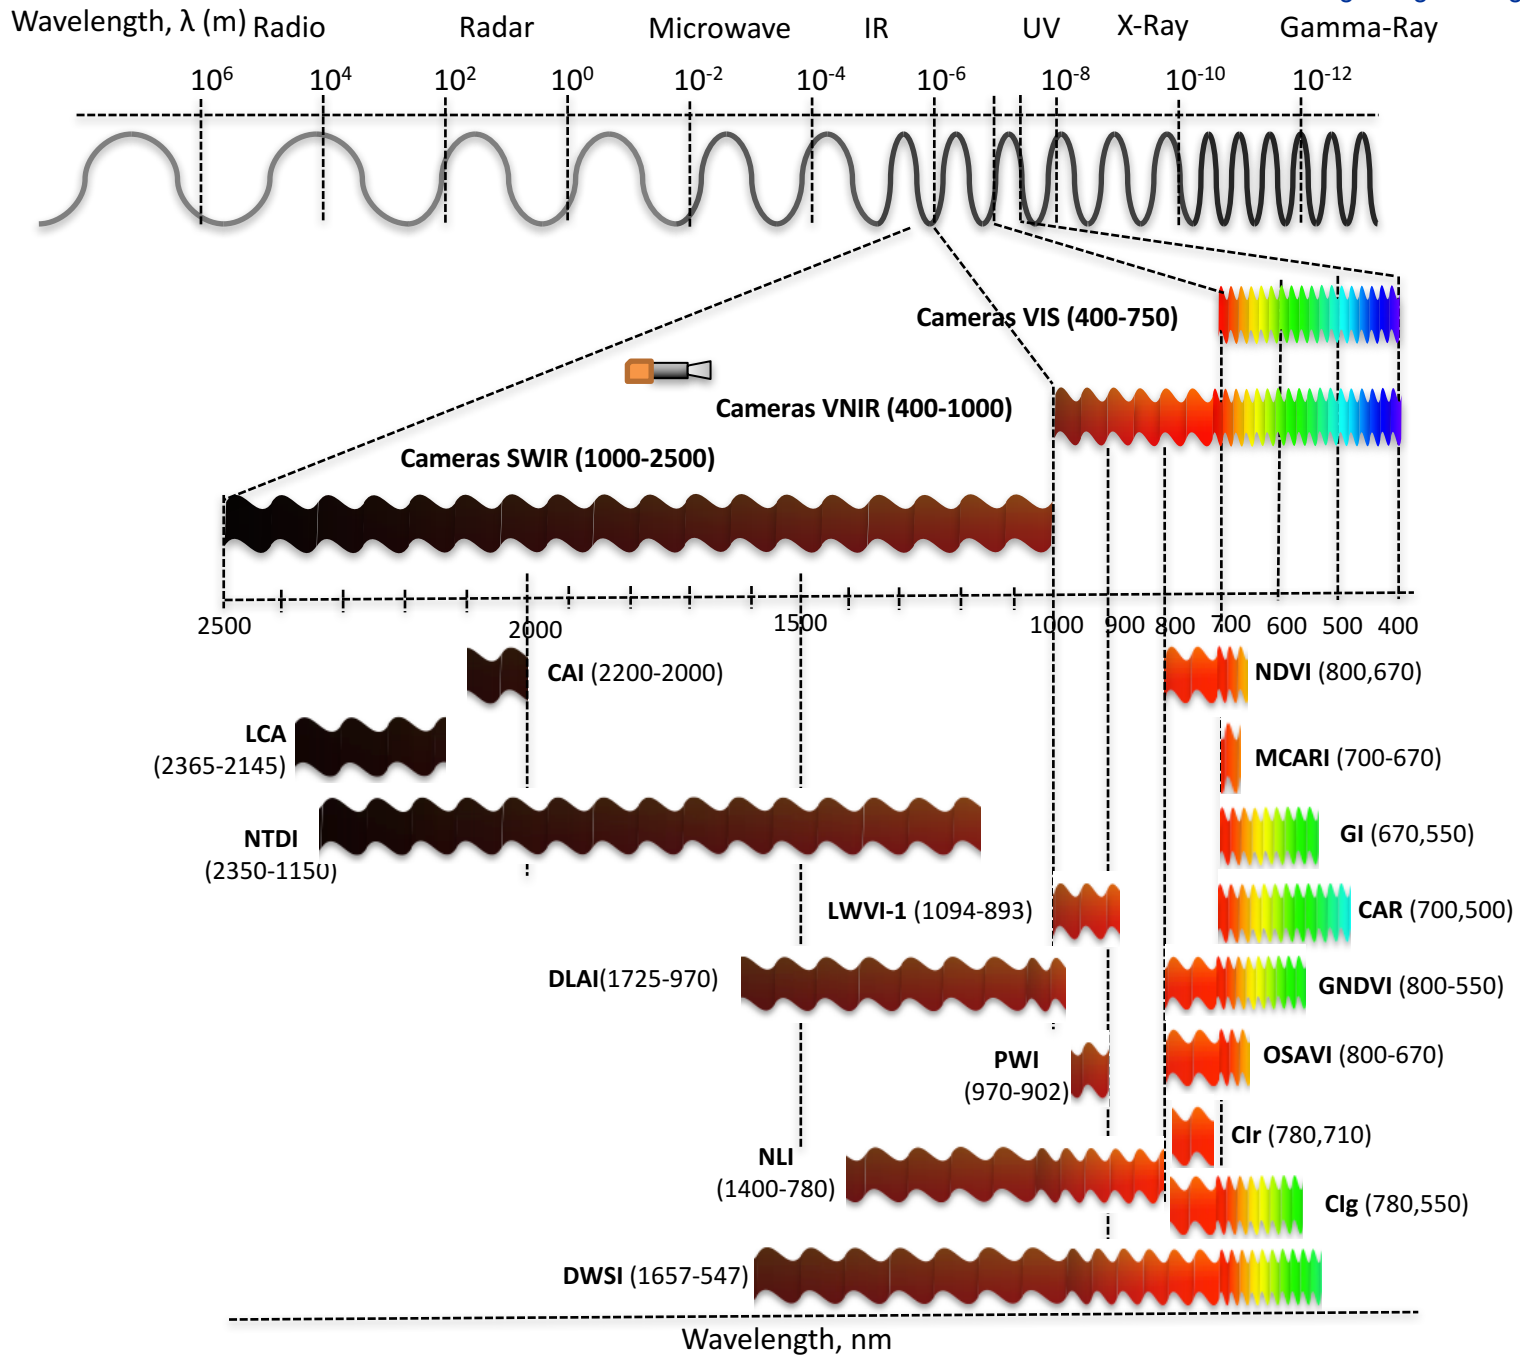

Supplement: gix092_giga-d-17-00043_revision-1.pdf [file gix092_giga-d-17-00043_revision-1.pdf]
